# Supplementary material for: Synthesis of ene-yne-enes by nickel-catalyzed double SN2′ substitution of 1,6-dichlorohexa-2,4-diyne
Source: Royal Society of Chemistry journal article supplement (doi:10.1039/c7cy00429j), 2017-01-01
Supplement: c7cy00429j1.pdf [file c7cy00429j1.pdf]

*Supporting Information for*

**Synthesis of Ene-yne-enes by Nickel-Catalyzed Double S<sub>N</sub>2'  
substitution of 1,6-Dichlorohexa-2,4-diyne**

Gongbao Wang<sup>a</sup>, Erik-Jan Lindeboom, Chris van Heerwaarden<sup>a</sup>, and Adriaan, J. Minnaard<sup>a\*</sup>

<sup>a</sup> Stratingh Institute for Chemistry, University of Groningen, Nijenborgh 7, 9747 AG, Groningen, The Netherlands  
E-mail: a.j.minnaard@rug.nl

**Table of Contents**

|                                                                                               |            |
|-----------------------------------------------------------------------------------------------|------------|
| <b>Table of Contents</b>                                                                      | <b>S1</b>  |
| <b>Copy of <sup>1</sup>H NMR, <sup>13</sup>C NMR, APT NMR and IR spectra of compound 1-10</b> | <b>S2</b>  |
| <b>X-ray structure determination of dicobalt complex 10</b>                                   | <b>S16</b> |
| <b>GC-MS spectra of compound 3-9</b>                                                          | <b>S18</b> |

# $^1\text{H}$ , $^{13}\text{C}$ , APT NMR and IR spectra

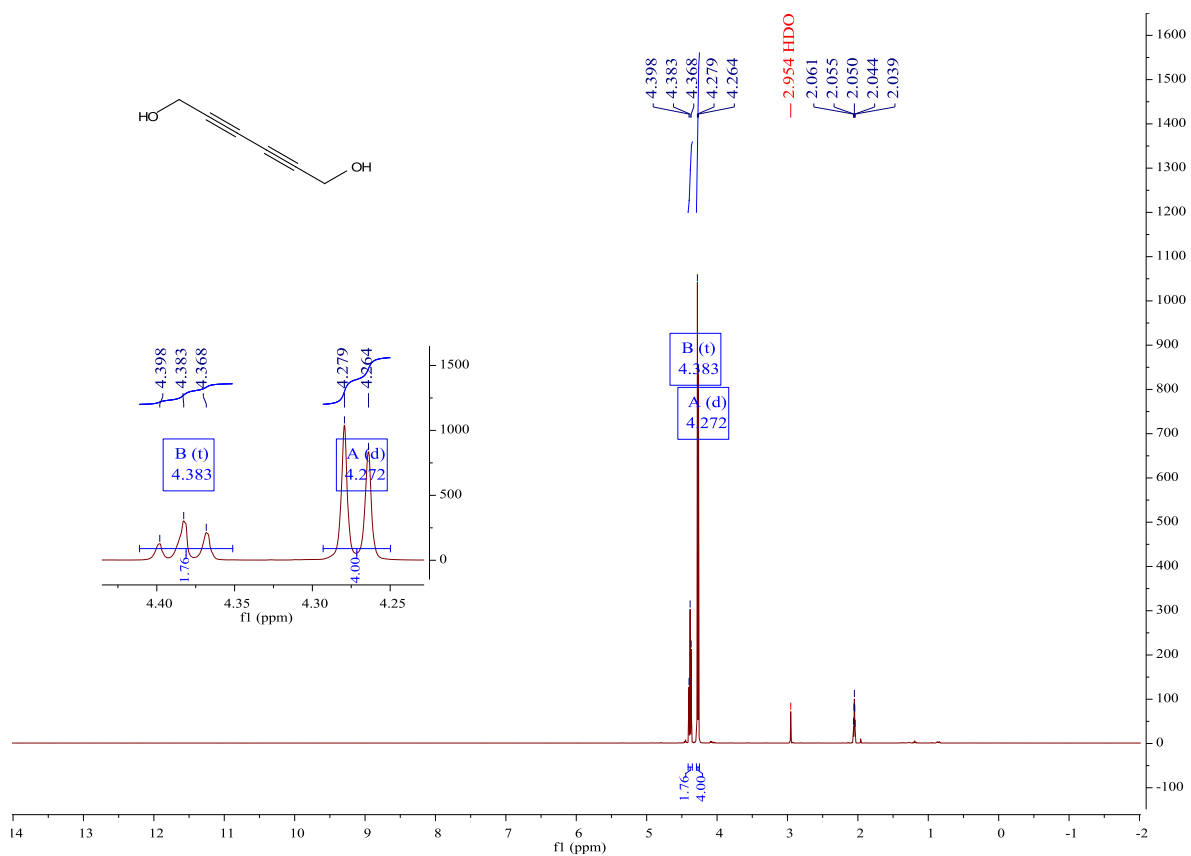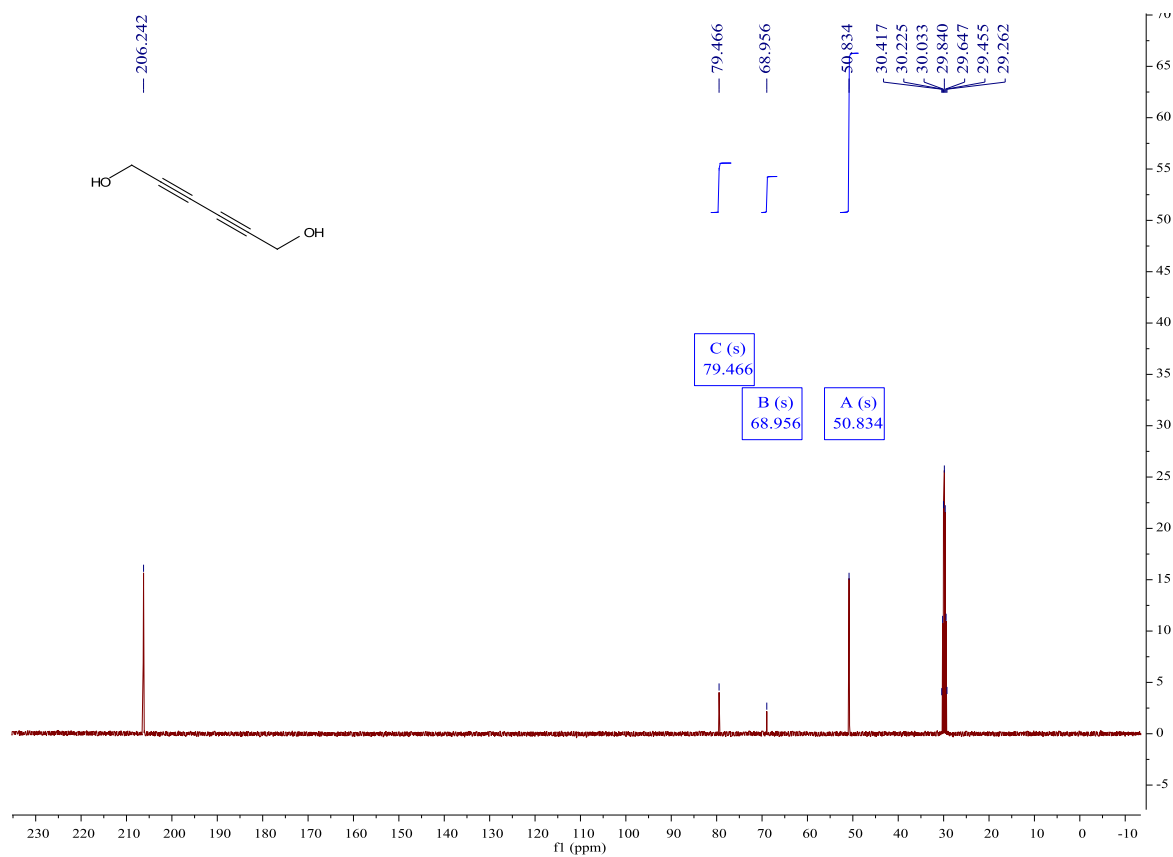

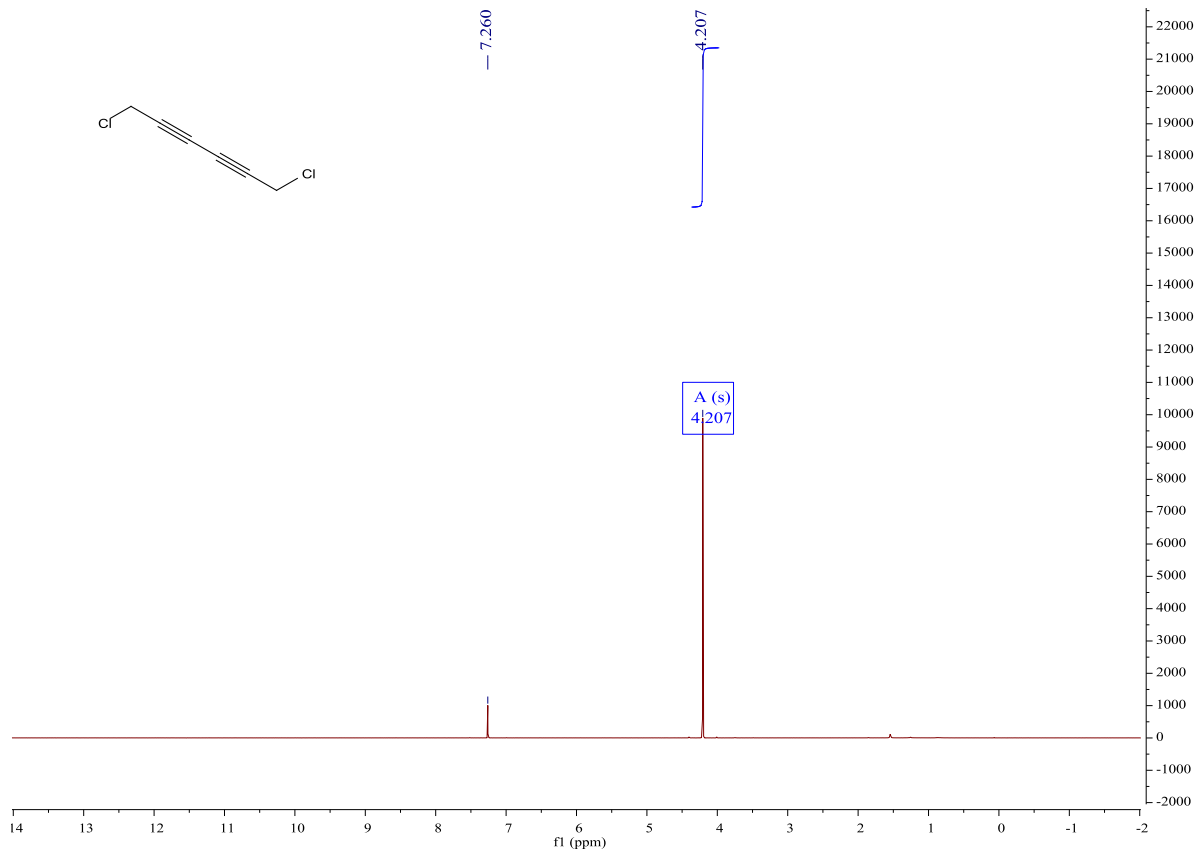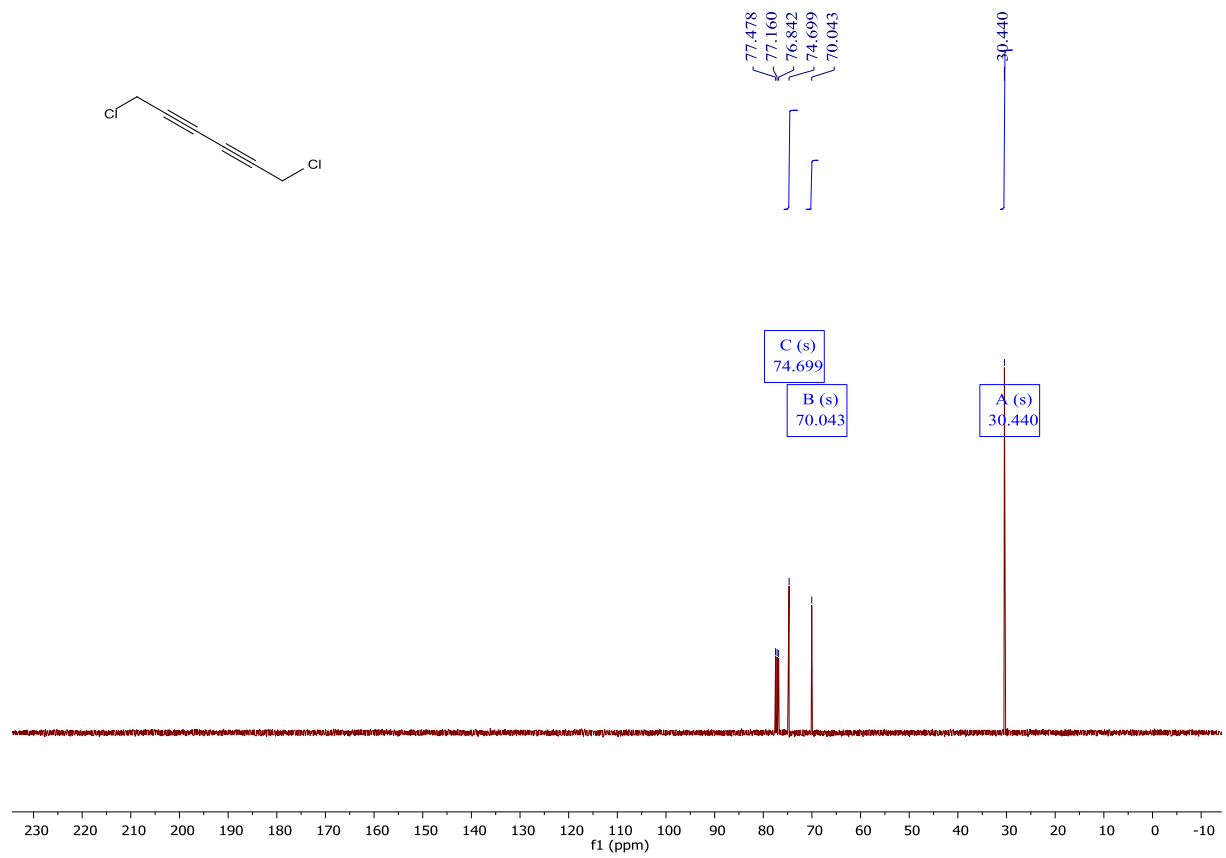

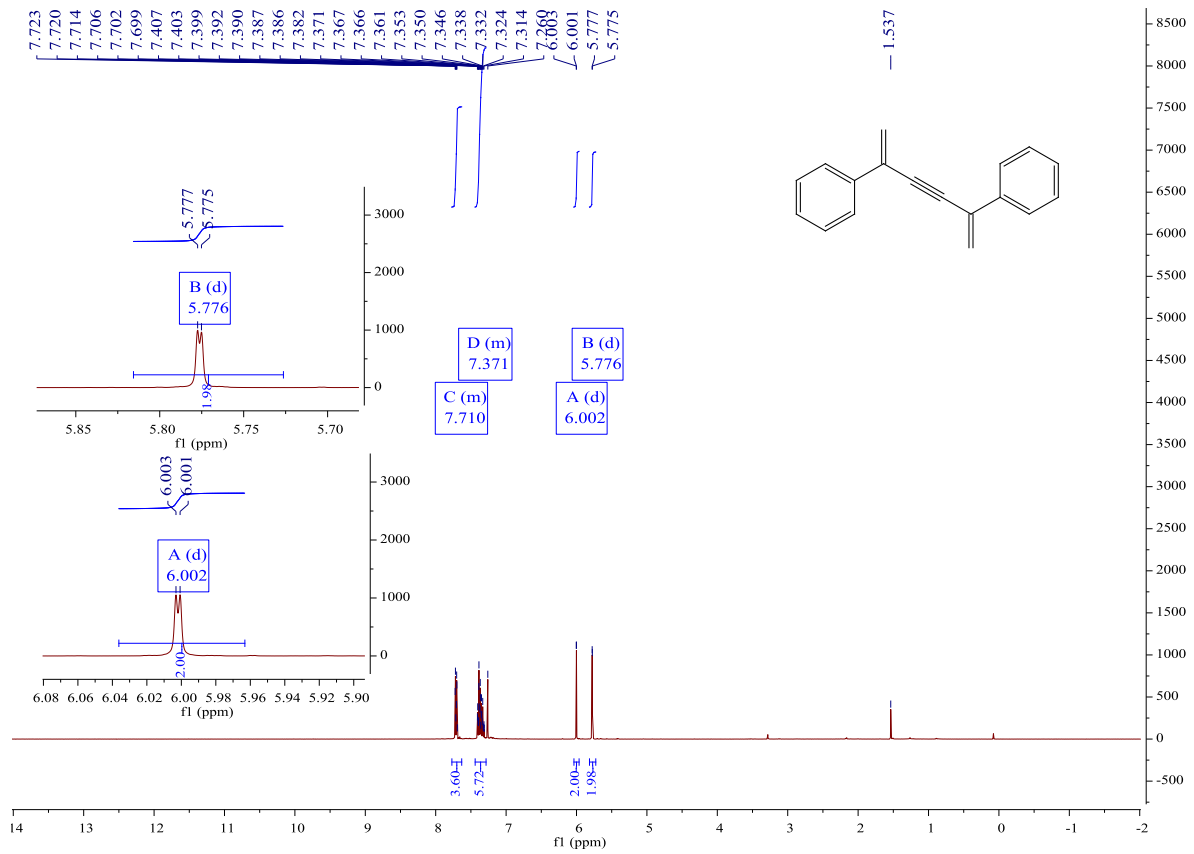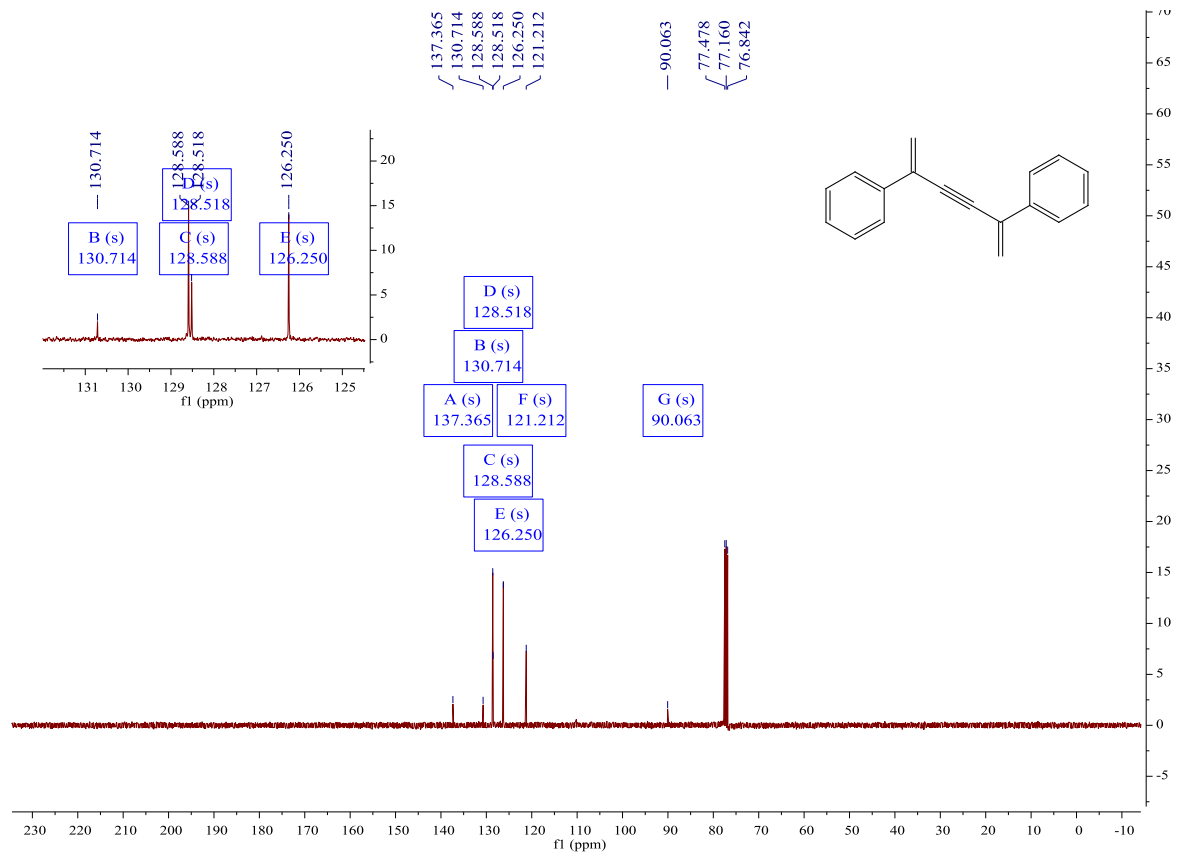

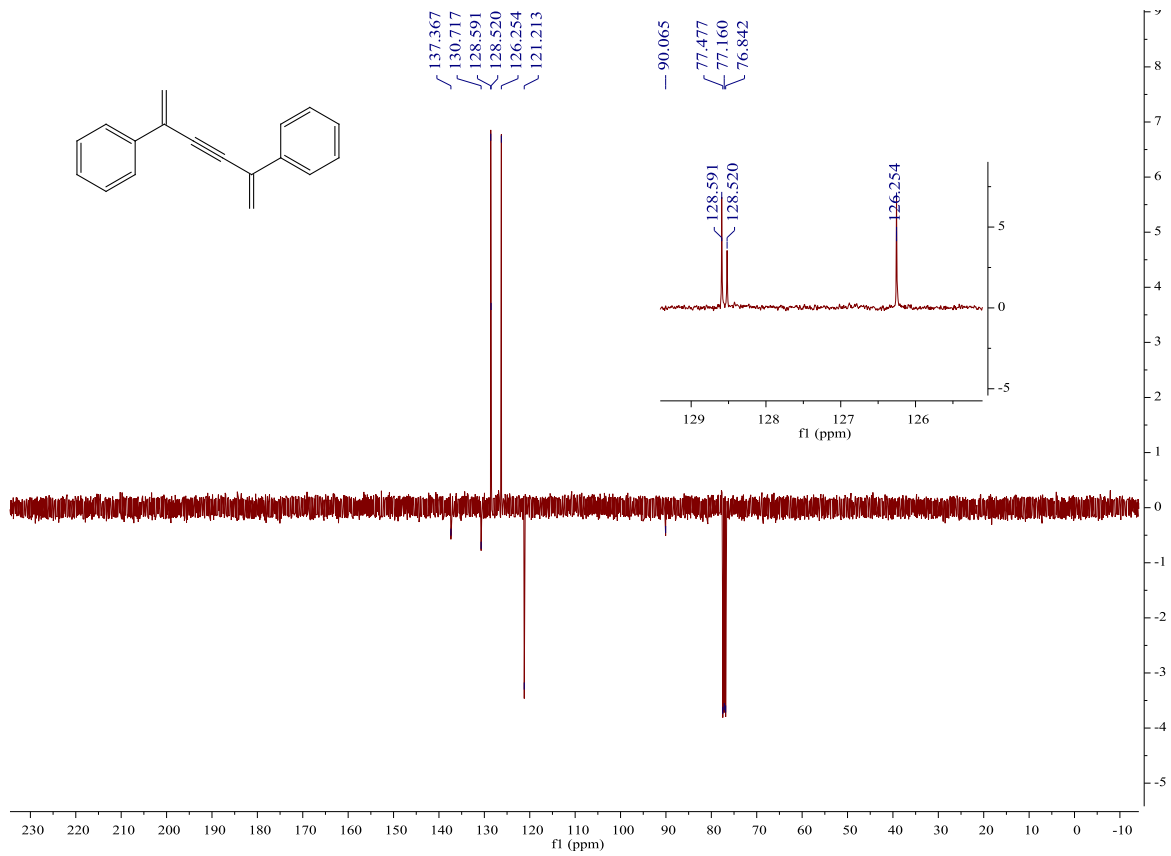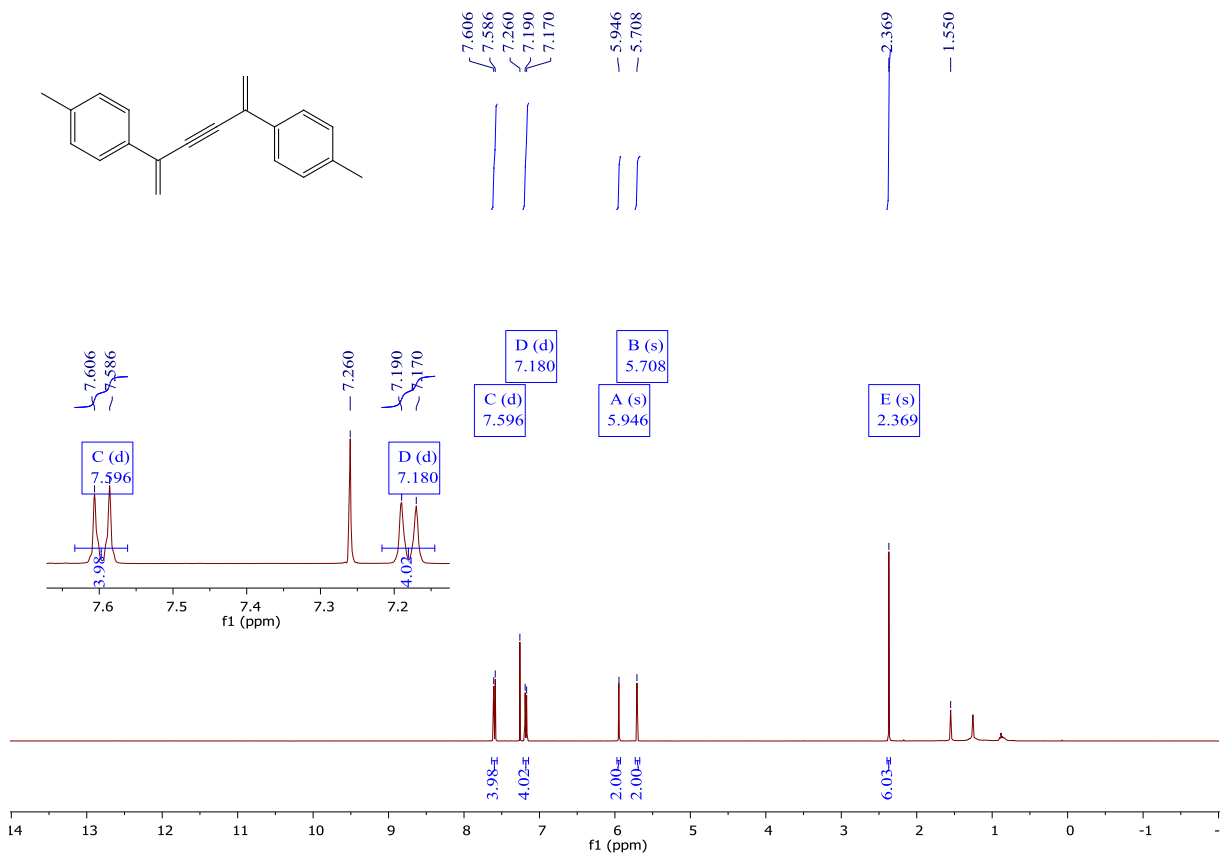

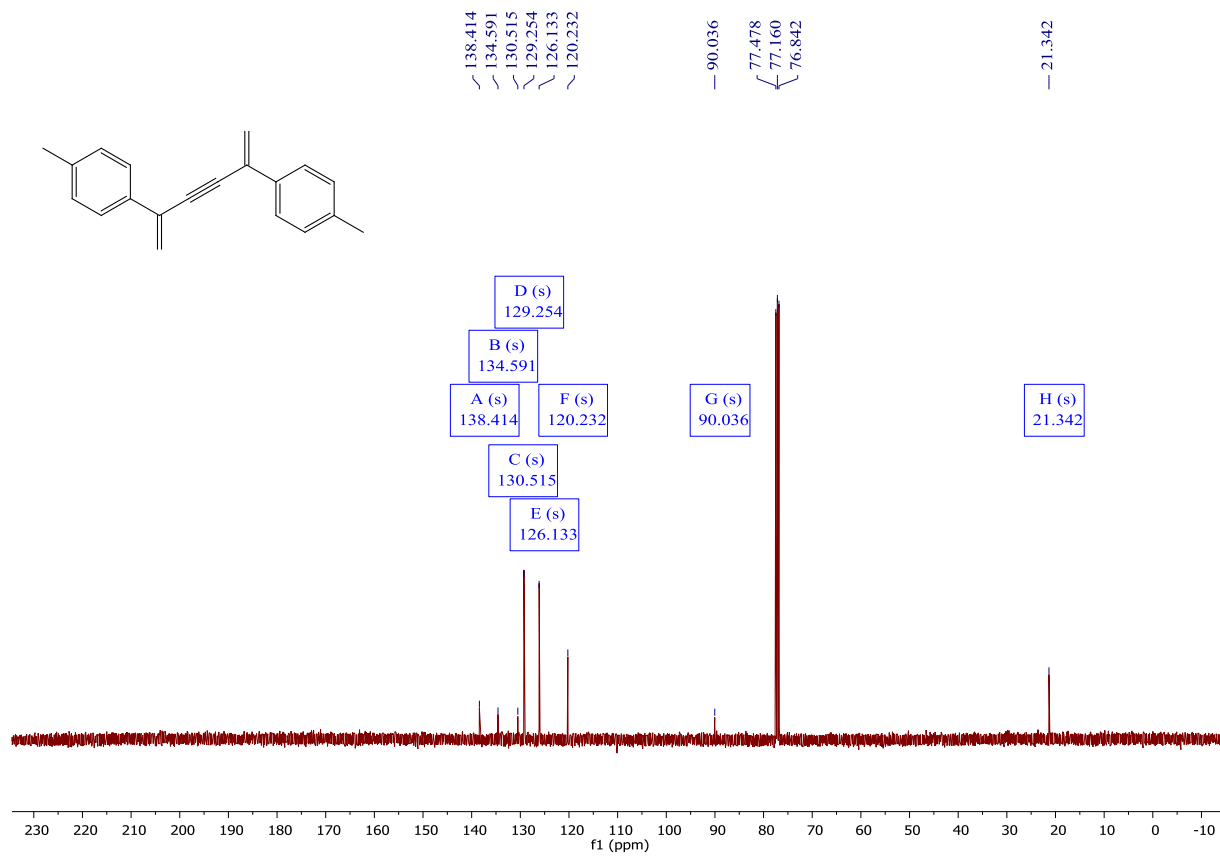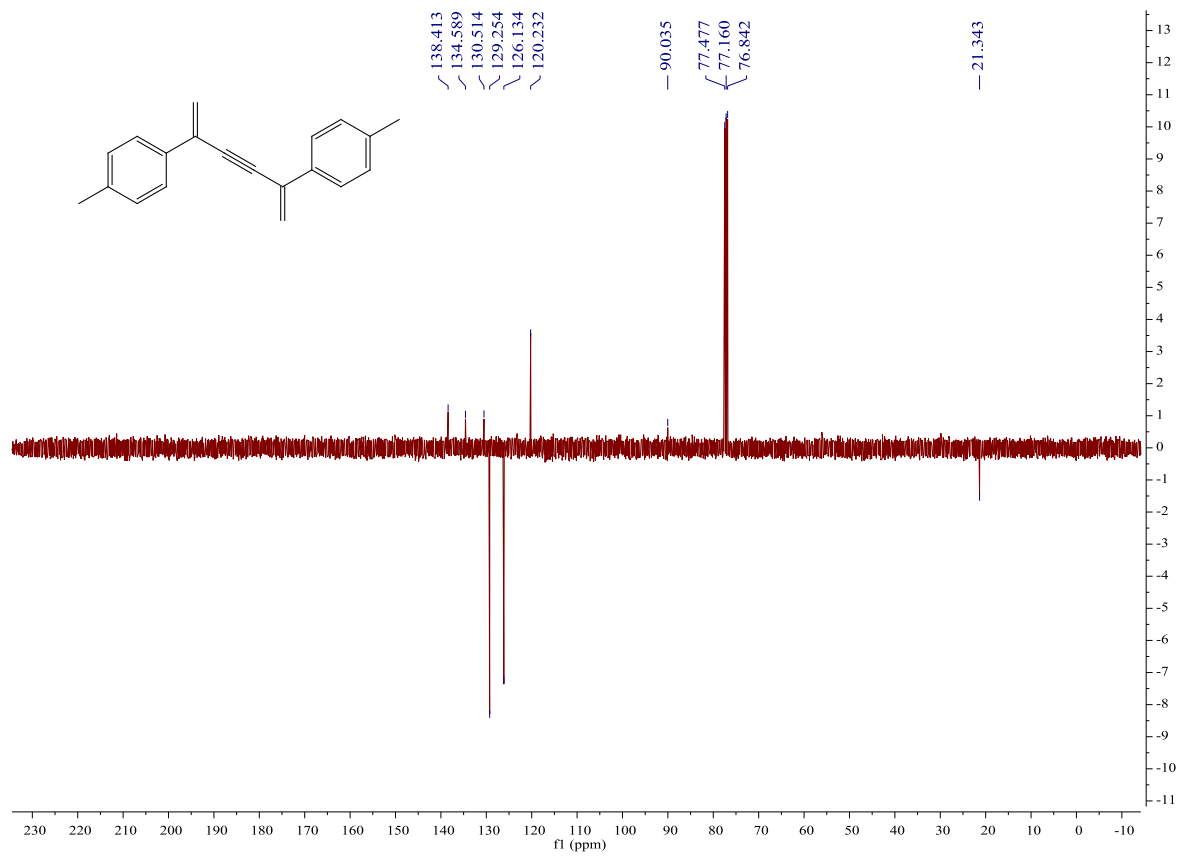

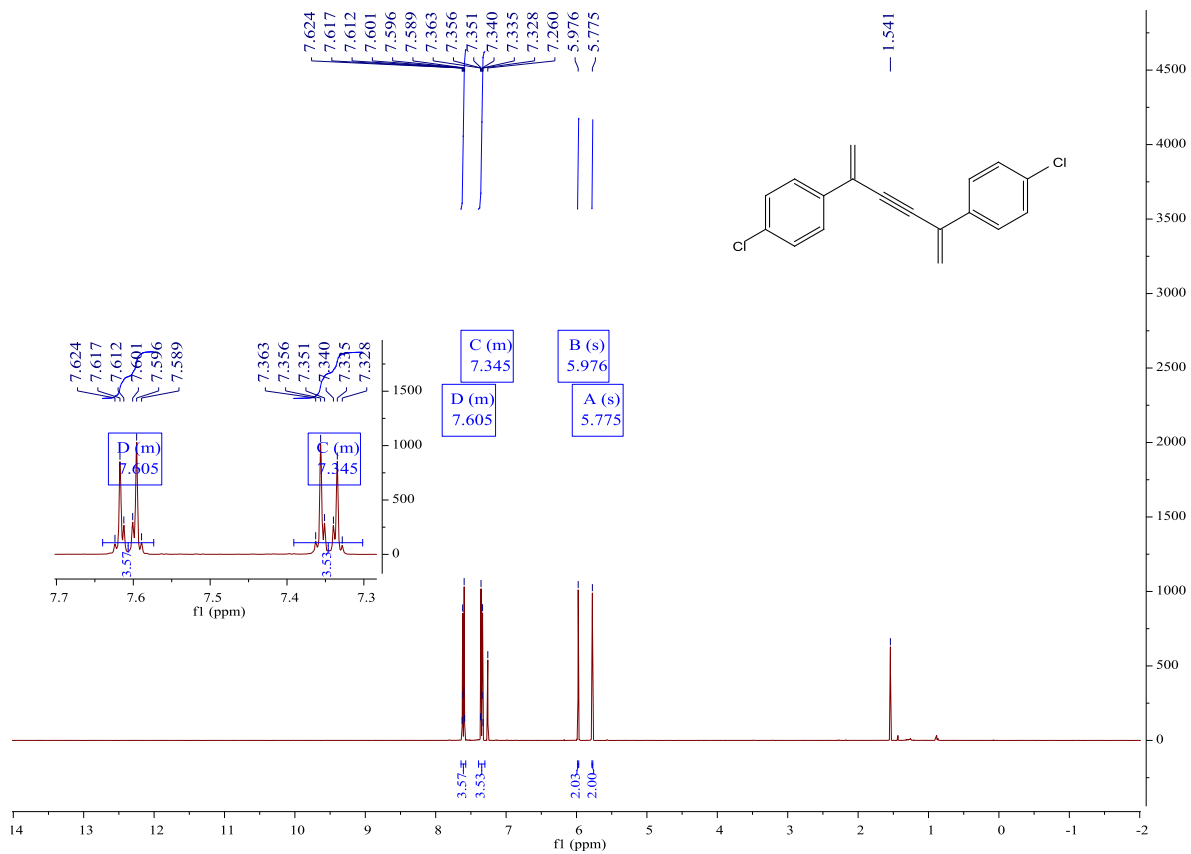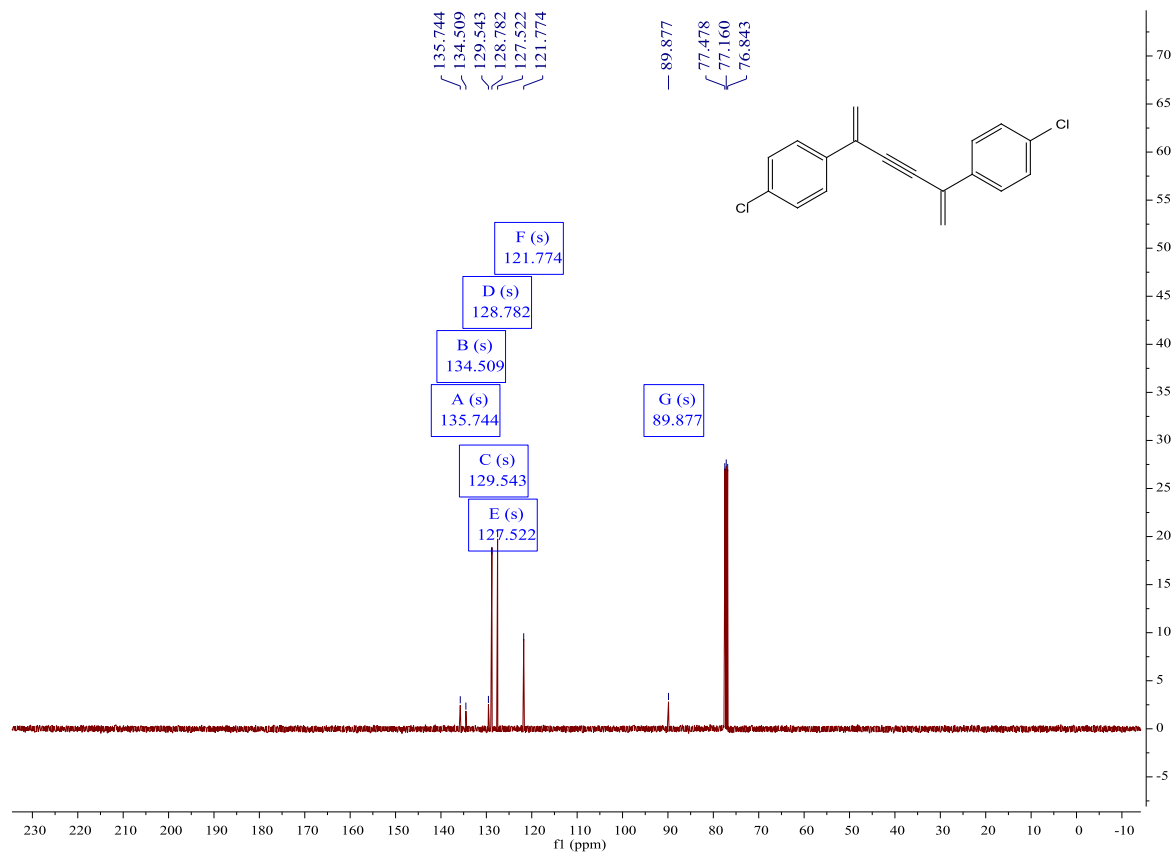

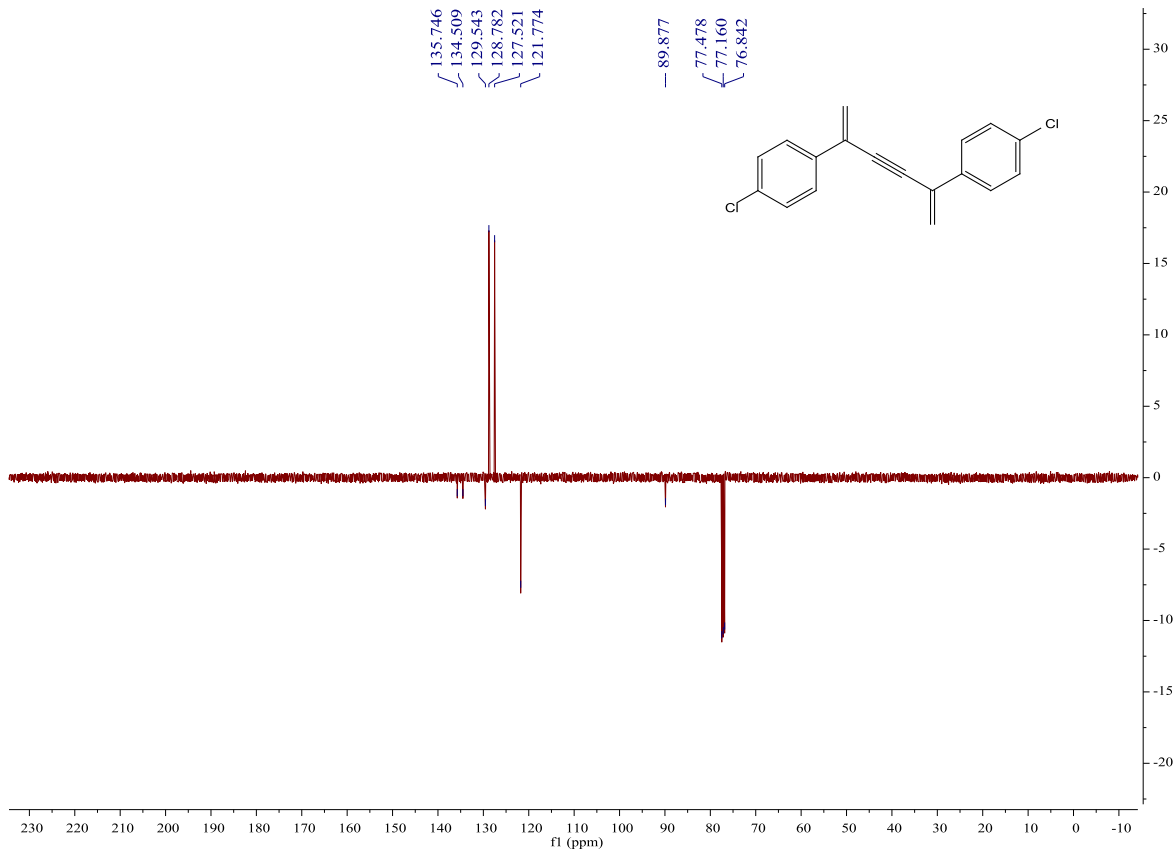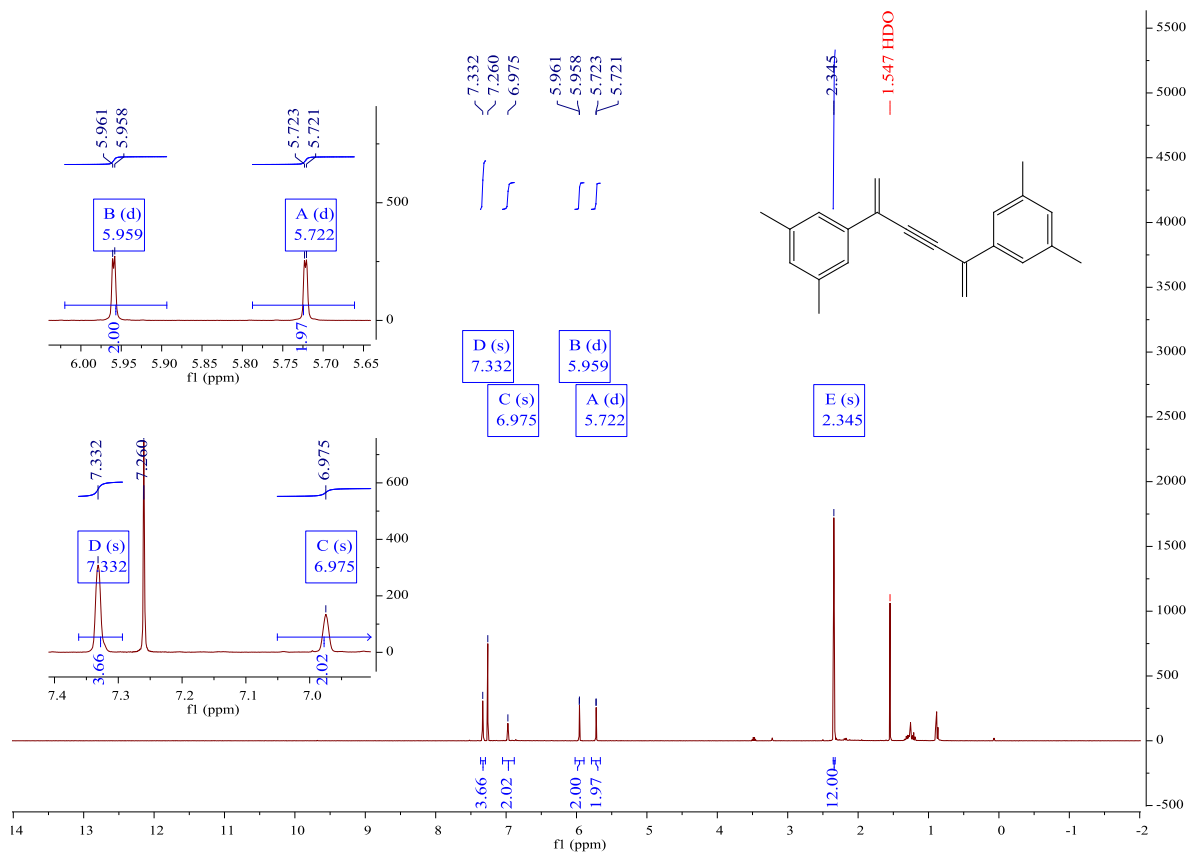



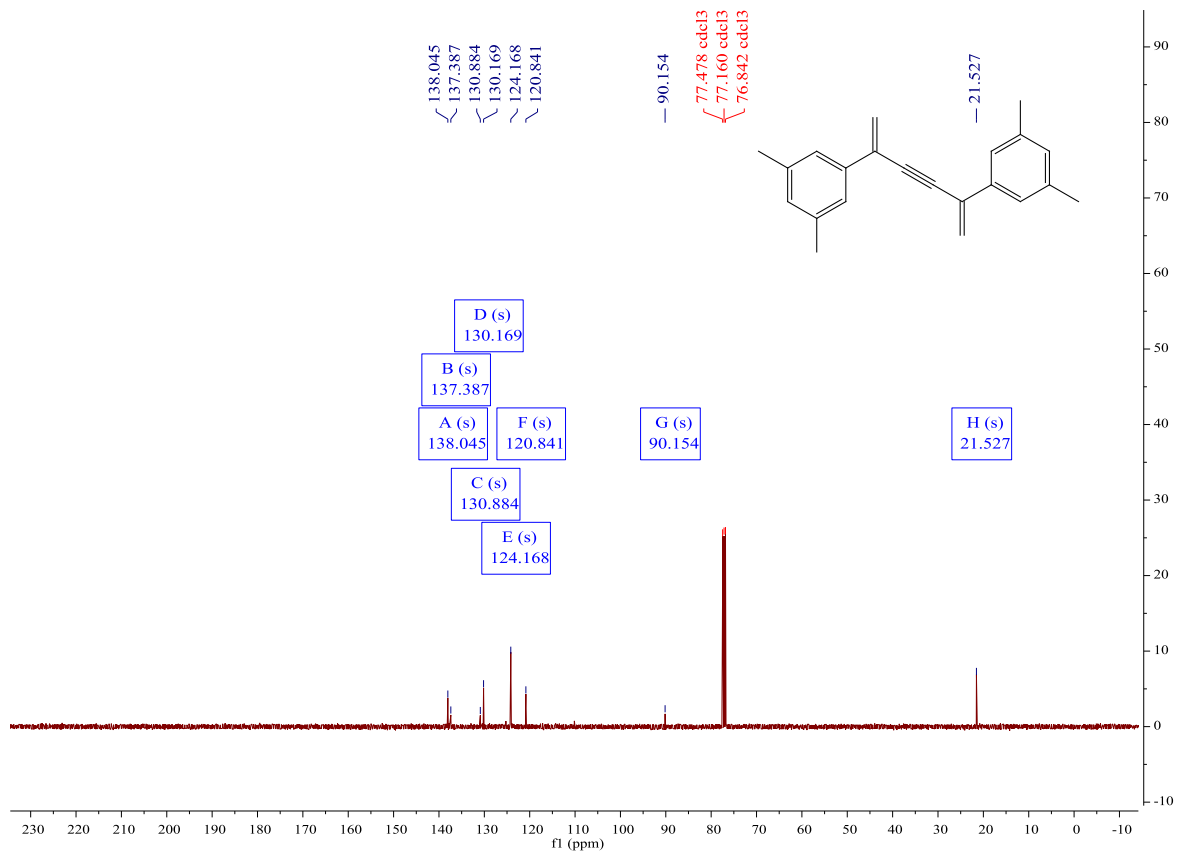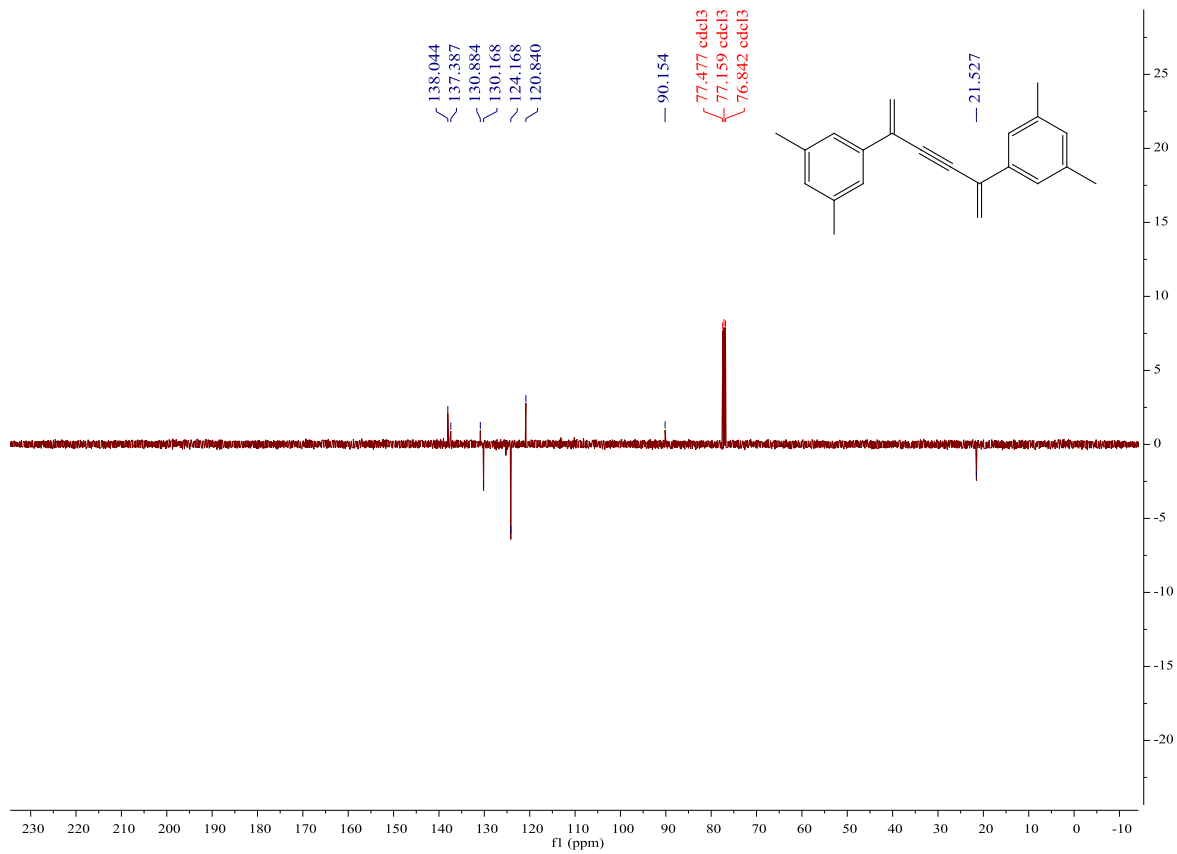

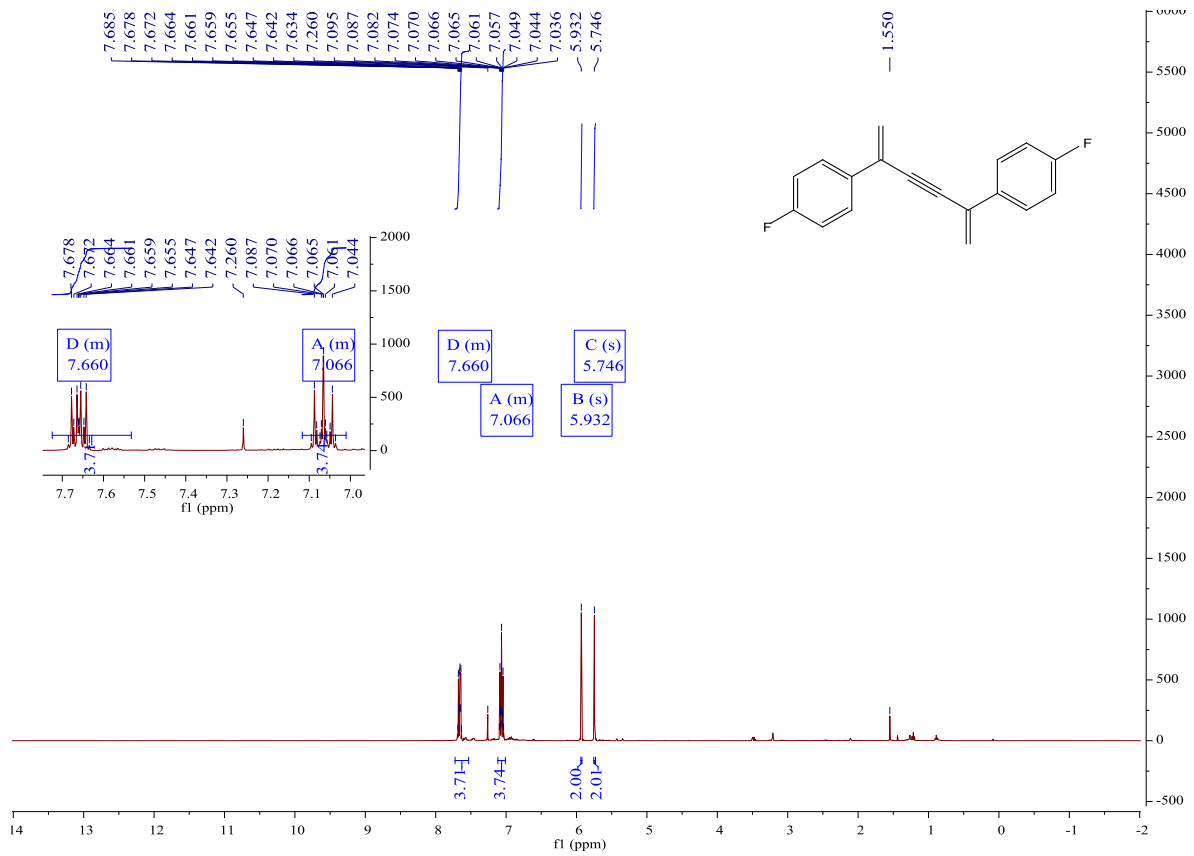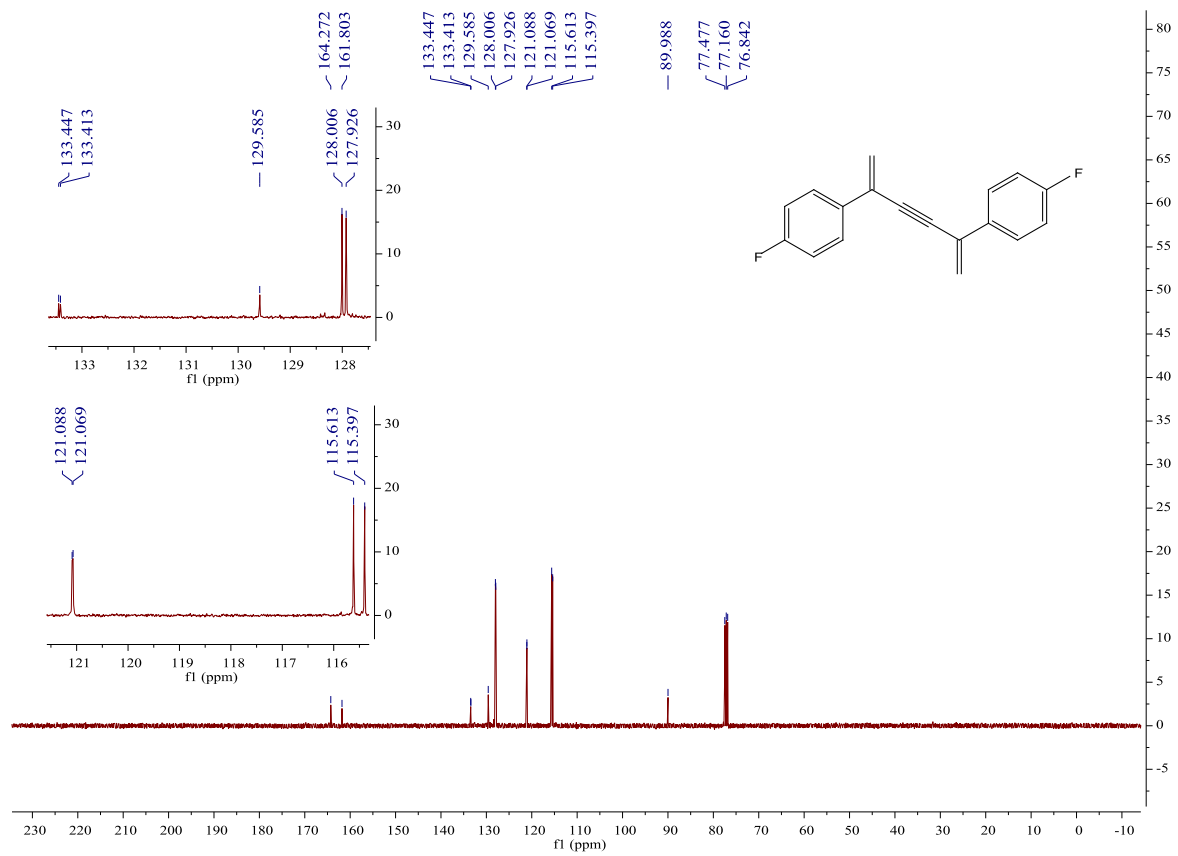

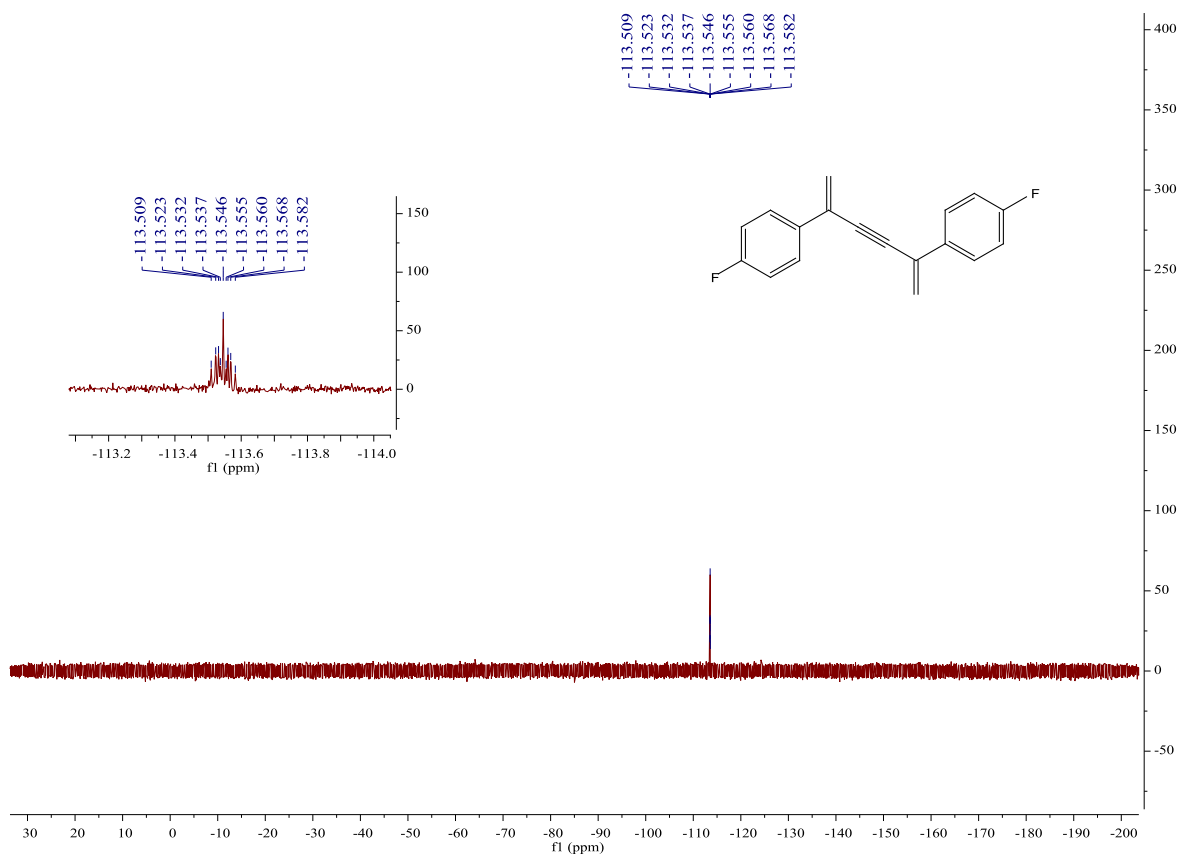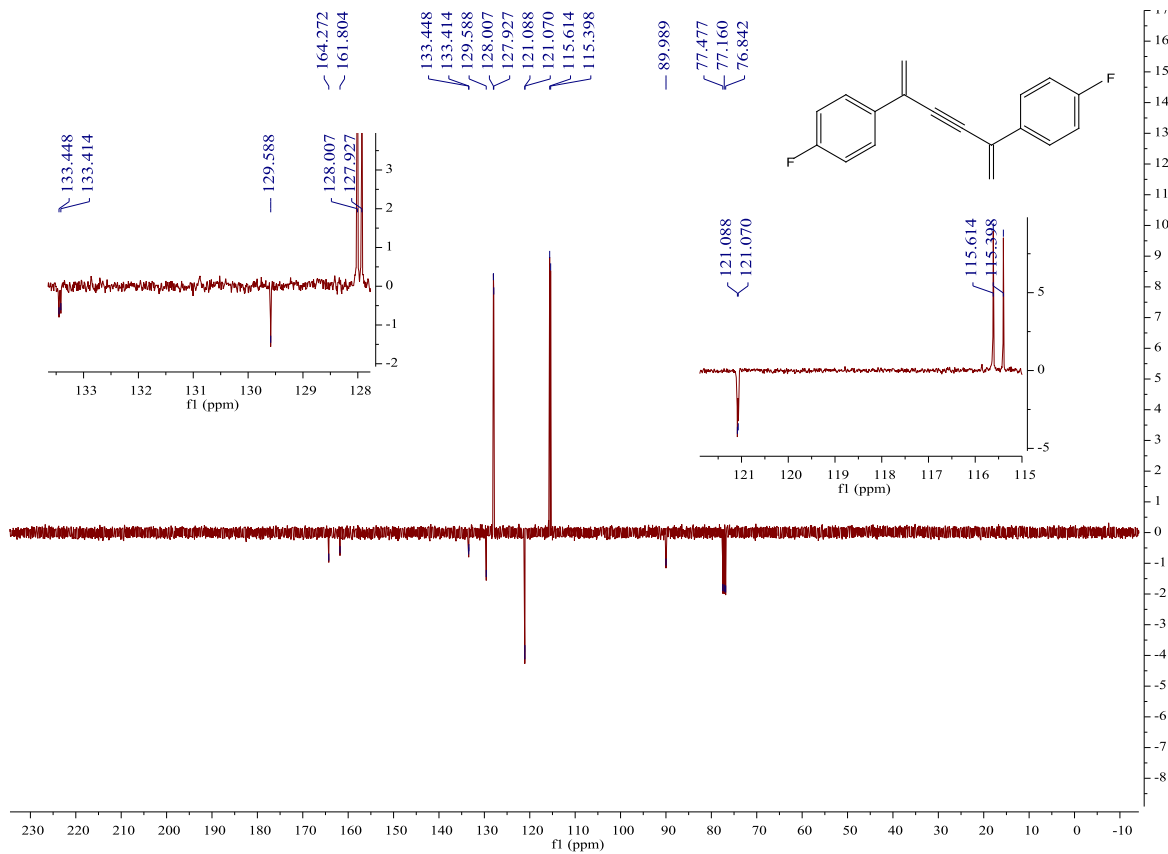

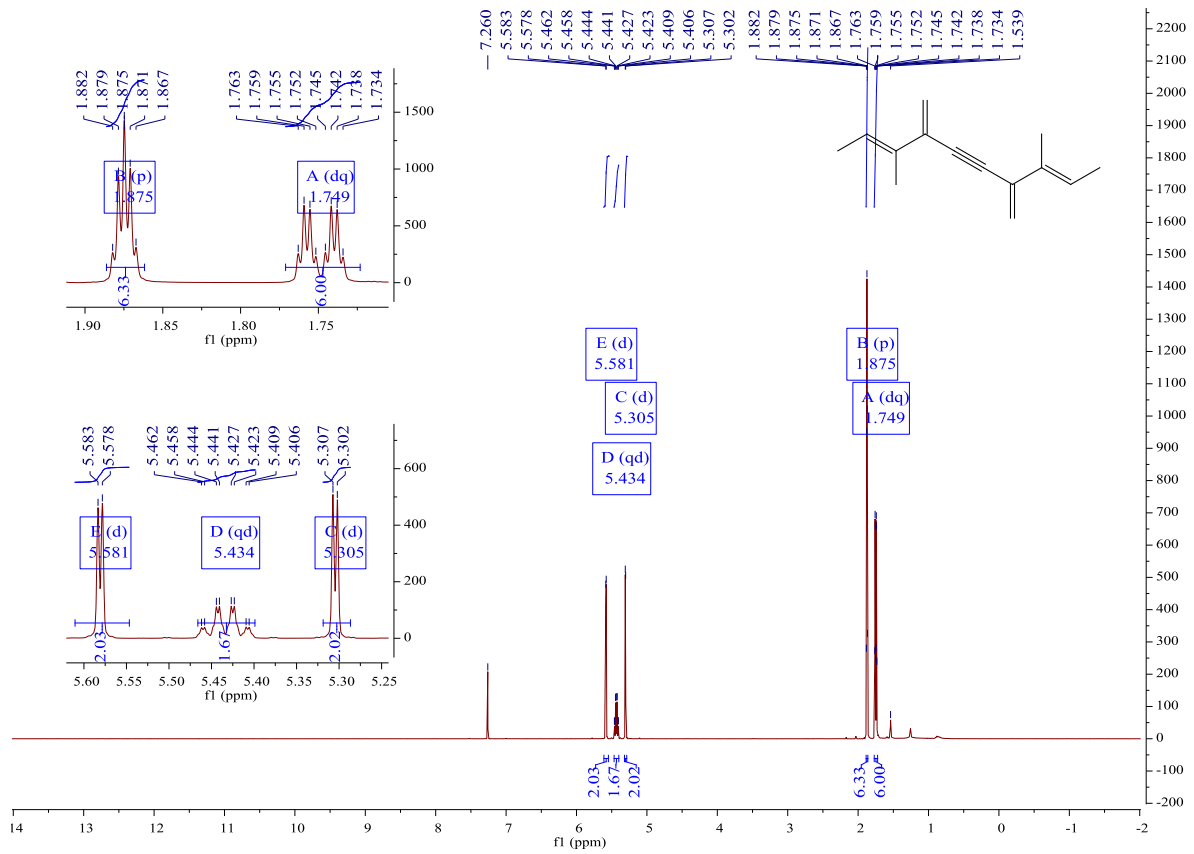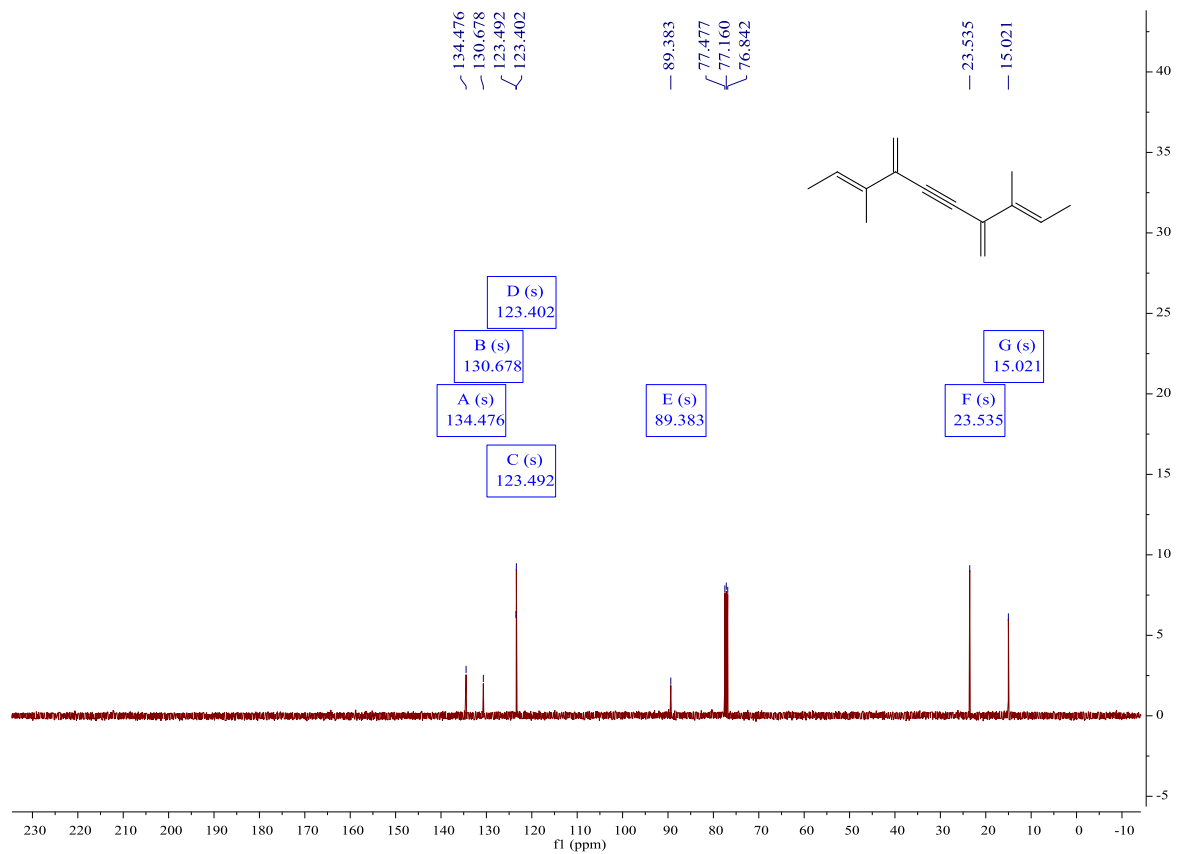

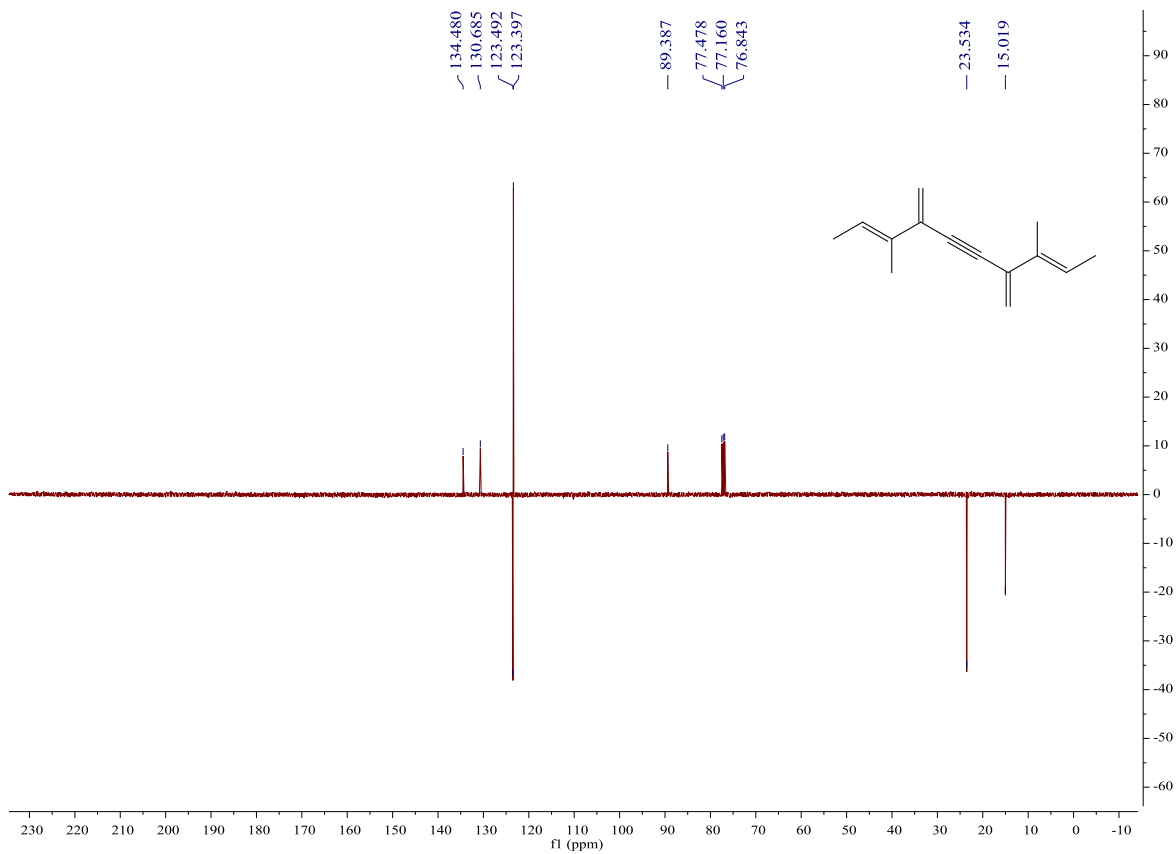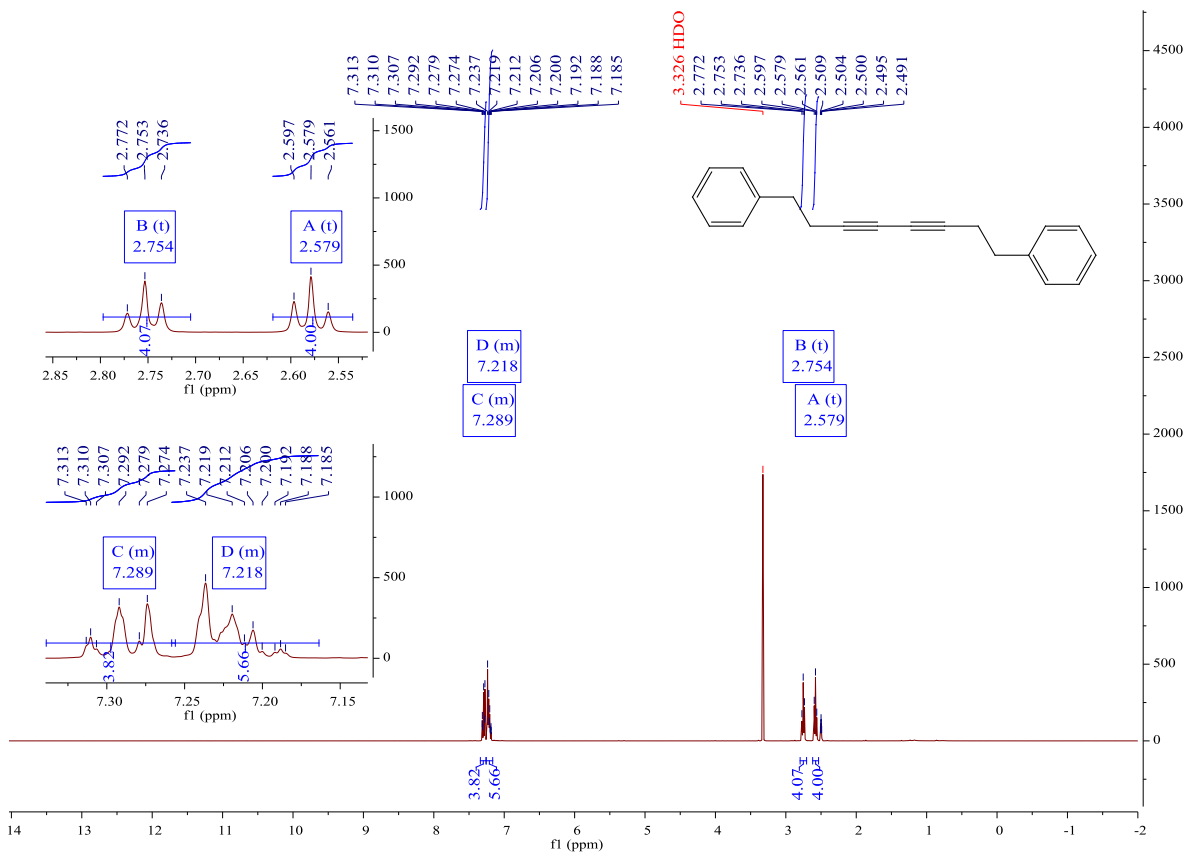

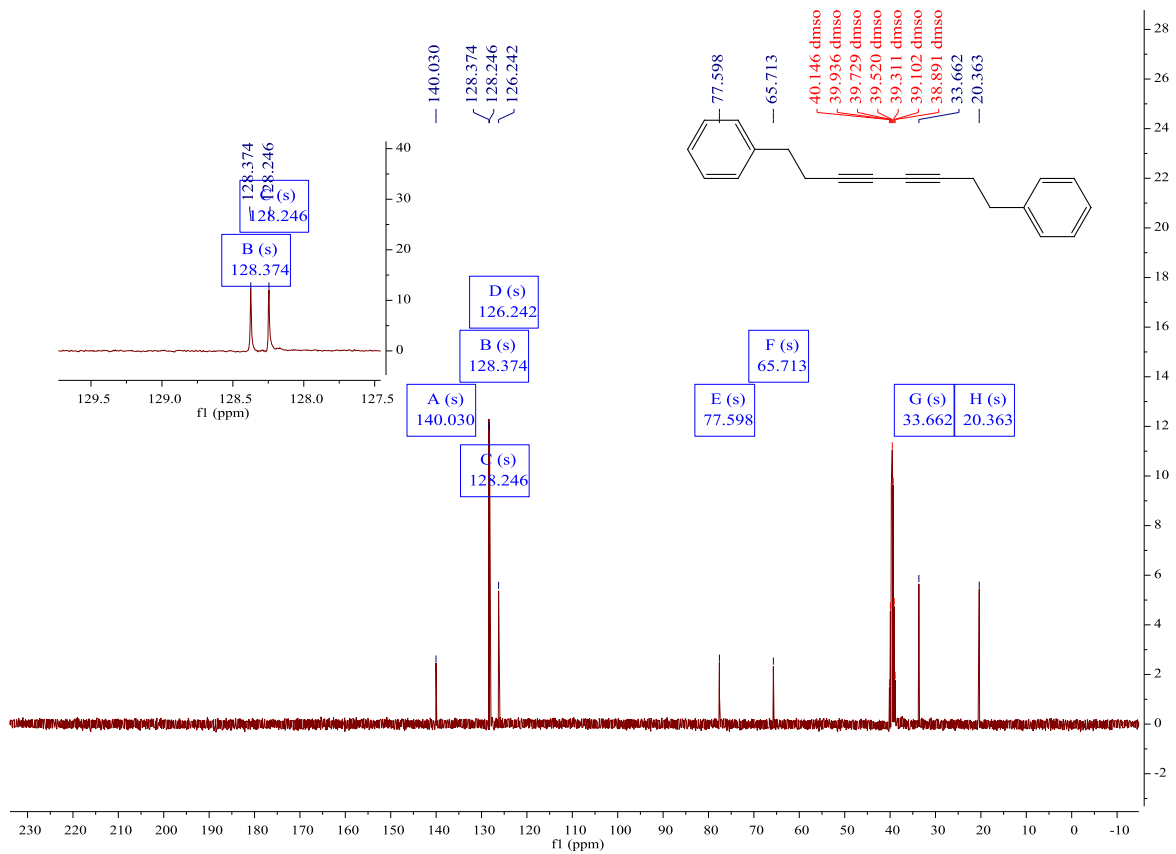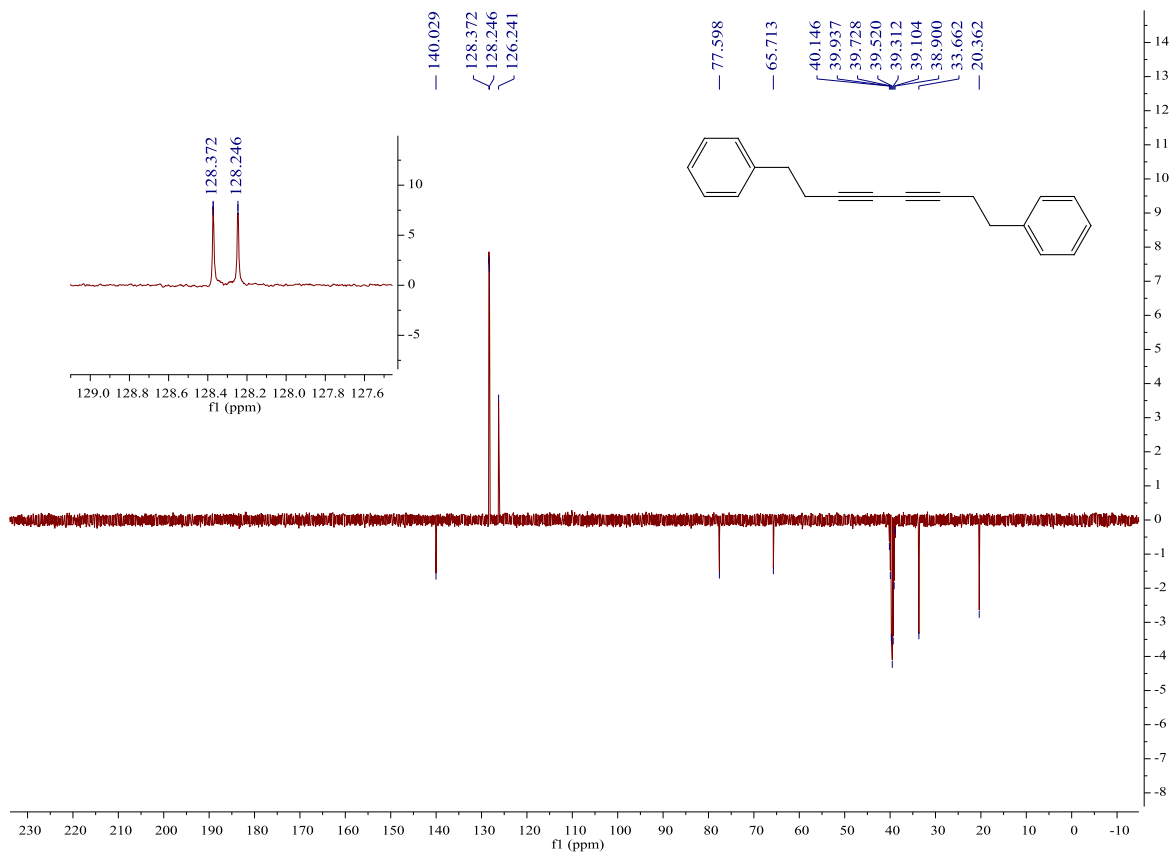

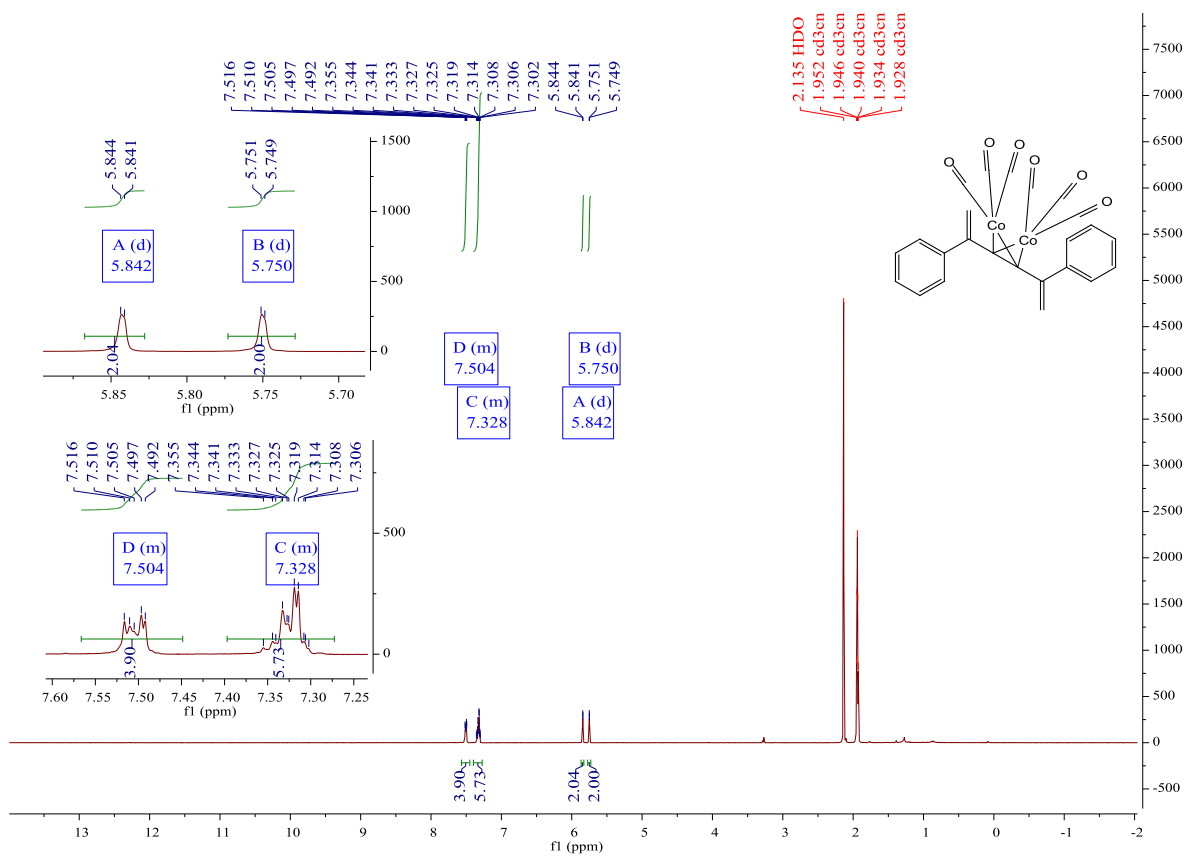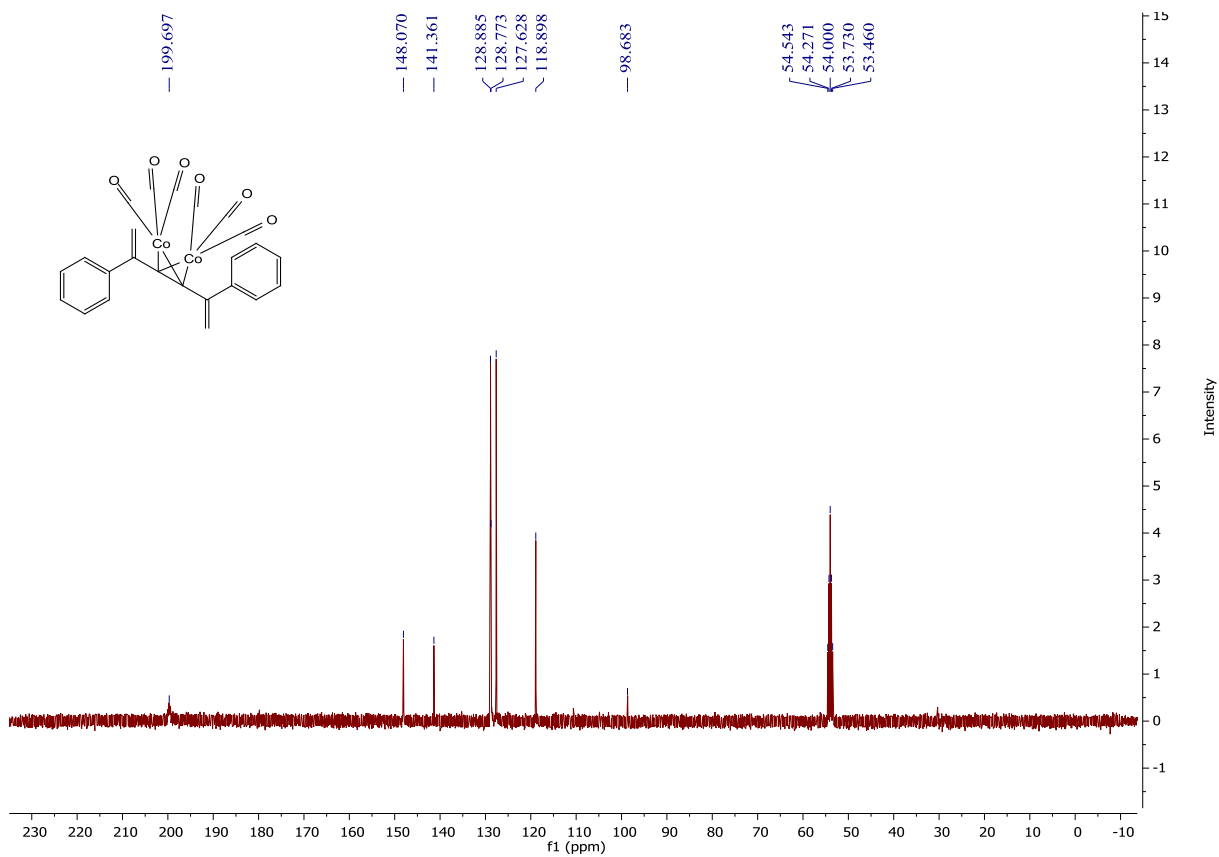

## IR spectrum of complex 10

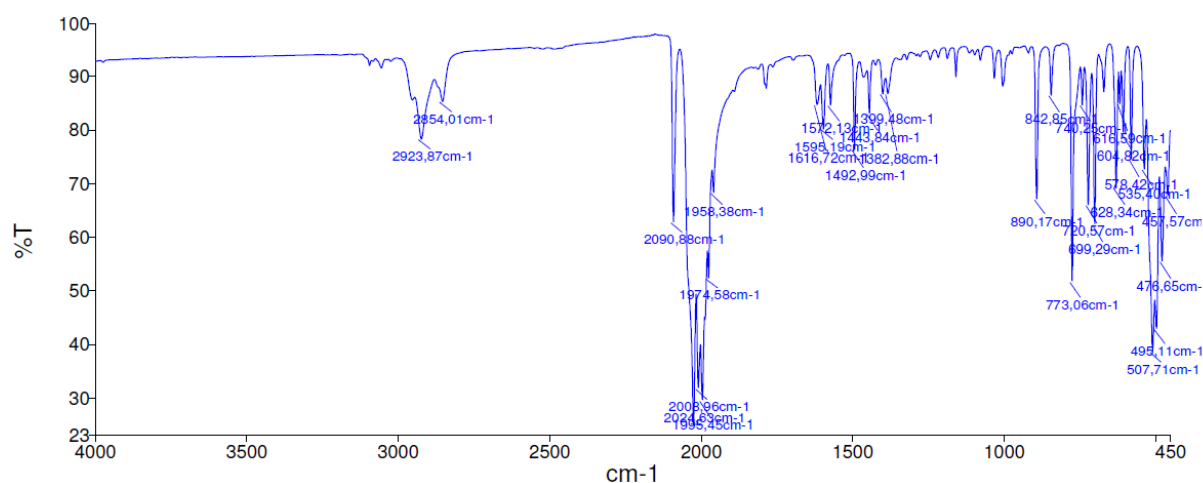

## X-ray structure determination of dicobalt complex 10

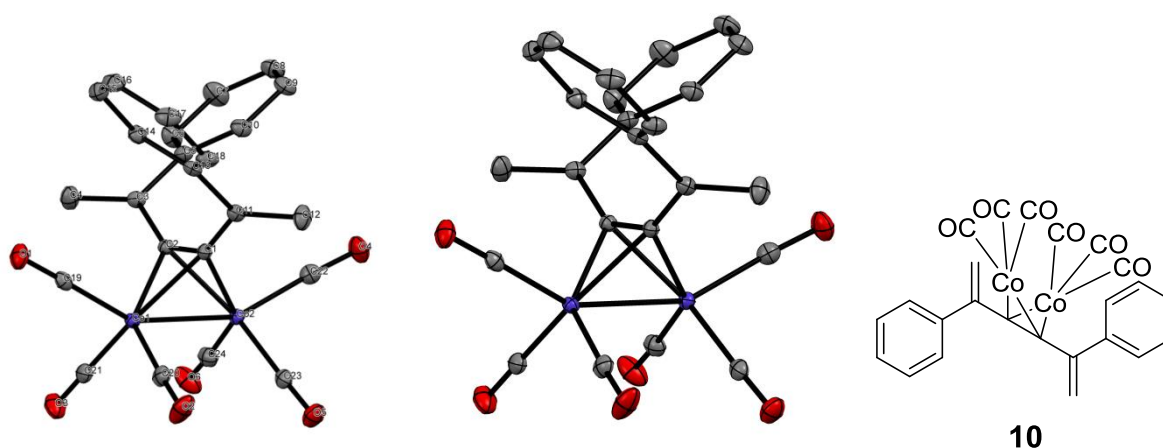

**Figure S1** Molecular structure of compound **10**, showing 50% probability ellipsoids. Hydrogen atoms are omitted for clarity.

A single crystal of compound **10** was mounted on top of a cryoloop and transferred into the cold nitrogen stream (100 K) of a Bruker-AXS D8 Venture diffractometer. Data collection and reduction was done using the Bruker software suite APEX3.<sup>1</sup> The final unit cell was obtained from the xyz centroids of 9770 reflections after integration. A multiscan absorption correction was applied, based on the intensities of symmetry-related reflections measured at different angular settings (*SADABS*). The structures were solved by direct methods using *SHELXT*<sup>2</sup> and refinement of the structure was performed using *SHLELXL*.<sup>3</sup> The hydrogen atoms were generated by geometrical considerations, constrained to idealised geometries and allowed to ride on their carrier atoms with an isotropic displacement parameter related to the equivalent displacement parameter of their carrier atoms. Crystal data and details on



data collection and refinement are presented in **Table 1**. The structure was deposited in the CCDC deposition number: 1519007.

**Table 1.** Crystallographic data for dicobalt complex **10**

|                                      |                                                                |
|--------------------------------------|----------------------------------------------------------------|
| chem formula                         | C <sub>24</sub> H <sub>14</sub> Co <sub>2</sub> O <sub>6</sub> |
| M <sub>r</sub>                       | 516.21                                                         |
| cryst syst                           | Triclinic                                                      |
| color, habit                         | red, block                                                     |
| size (mm)                            | 0.24 x 0.29 x 0.32                                             |
| space group                          | P -1                                                           |
| a (Å)                                | 8.4376(11)                                                     |
| b (Å)                                | 10.1022(12)                                                    |
| c (Å)                                | 13.0614(15)                                                    |
| α, deg                               | 98.593(4)                                                      |
| β, deg                               | 92.973(4)                                                      |
| γ, deg                               | 100.142(4)                                                     |
| V (Å <sup>3</sup> )                  | 1080.1(2)                                                      |
| Z                                    | 2                                                              |
| ρ <sub>calc</sub> g.cm <sup>-3</sup> | 1.587                                                          |
| μ(Mo K α), cm <sup>-1</sup>          | 1.574                                                          |
| F(000)                               | 520                                                            |
| temp (K)                             | 100(2)                                                         |
| θ range (deg)                        | 3.245 – 27.925                                                 |
| data collected (h,k,l)               | -11:11, -13:13, -17:17                                         |
| no. of rflns collected               | 44480                                                          |
| no. of indepndt reflns               | 5140                                                           |
| observed reflns                      | 4915 (F <sub>o</sub> ≥ 2 σ(F <sub>o</sub> ))                   |
| R(F) (%)                             | 1.78                                                           |
| wR(F <sup>2</sup> ) (%)              | 4.78                                                           |
| GooF                                 | 1.057                                                          |
| Weighting a,b                        | 0.0228, 0.5470                                                 |
| params refined                       | 289                                                            |
| restraints                           | 0                                                              |
| min, max resid dens                  | -0.294, 0.361                                                  |

<sup>1</sup> Bruker. *APEX3, SAINT and SADABS*. Bruker AXS Inc., Madison, Wisconsin, USA. **2016**.

<sup>2</sup> Sheldrick, G. M. *Acta Cryst.* **2015**, A71, 3-8.

<sup>3</sup> Sheldrick, G. M.. *Acta Cryst.* **2008**, A64, 112-122.

# GC-MS Spectra

Method

==== Analytical Line 1 =====

```
[GC-2010]
Column Oven Temp.      :50.0 °C
Injection Temp.        :300.00 °C
Injection Mode         :Split
Flow Control Mode     :Linear Velocity
Pressure               :68.1 kPa
Total Flow             :64.1 mL/min
Column Flow           :1.20 mL/min
Linear Velocity        :39.7 cm/sec
Purge Flow             :3.0 mL/min
Split Ratio           :50.0
High Pressure Injection :OFF
Carrier Gas Saver     :OFF
Splitter Hold         :OFF
Oven Temp. Program
Rate                   Temperature(°C)   Hold Time(min)
-                       50.0                       5.00
10.00                  300.0                      40.00

< Ready Check Heat Unit >
Column Oven           : Yes
SPL1                  : Yes
MS                    : Yes
SPL2                  : Yes
MS                    : Yes

< Ready Check Detector(FTD) >
< Ready Check Baseline Drift >
< Ready Check Injection Flow >
SPL1 Carrier         : Yes
SPL1 Purge           : Yes
SPL2 Carrier         : Yes
SPL2 Purge           : Yes

< Ready Check APC Flow >
< Ready Check Detector APC Flow >
External Wait        : No
Equilibrium Time     : 0.0 min
```

[GC Program]

==== Analytical Line 2 =====

```
[GC-2010]
Injection Temp.      :250.00 °C
Injection Mode       :Split
Flow Control Mode    :Linear Velocity
Pressure             :68.1 kPa
Total Flow           :64.1 mL/min
Column Flow         :1.20 mL/min
Linear Velocity      :39.7 cm/sec
Purge Flow          :3.0 mL/min
Split Ratio         :50.0
High Pressure Injection :OFF
Carrier Gas Saver   :OFF
Splitter Hold       :OFF
Oven Temp. Program
Rate                 Temperature(°C)   Hold Time(min)
-                     50.0                       5.00
10.00                300.0                      40.00
```

```
[GCMS-QP2010]
IonSourceTemp       :200.00 °C
Interface Temp.     :225.00 °C
Solvent Cut Time    :3.00 min
Detector Gain Mode  :Relative
Detector Gain       :1.25 kV +0.00 kV
Threshold           :0
```

[MS Table]

```
--Group 1 - Event 1--
Start Time          :3.00min
End Time            :65.00min
ACQ Mode            :Scan
Event Time          :0.30sec
Scan Speed          :2000
Start m/z           :20.00
End m/z             :550.00
```

```
Sample Inlet Unit   :GC
Inlet Line          :Line 2
```

Analyzed by : Admin  
 Analyzed : 16-3-2016 21:22:49  
 Sample Type : Unknown  
 Sample Name : test  
 \$If\$(Tray!=)Tray : Tray1  
 Sample Amount : 1  
 Dilution Factor : 1  
 Injection Volume : 1.00  
 Modified by : Admin  
 Modified : 4-5-2016 15:02:16

Sample Information

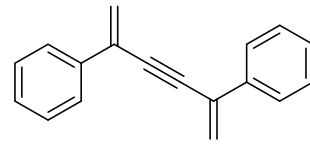

Chromatogram test D:\Data 2016\group Minnaard\Gongbao\GBW187.qgd

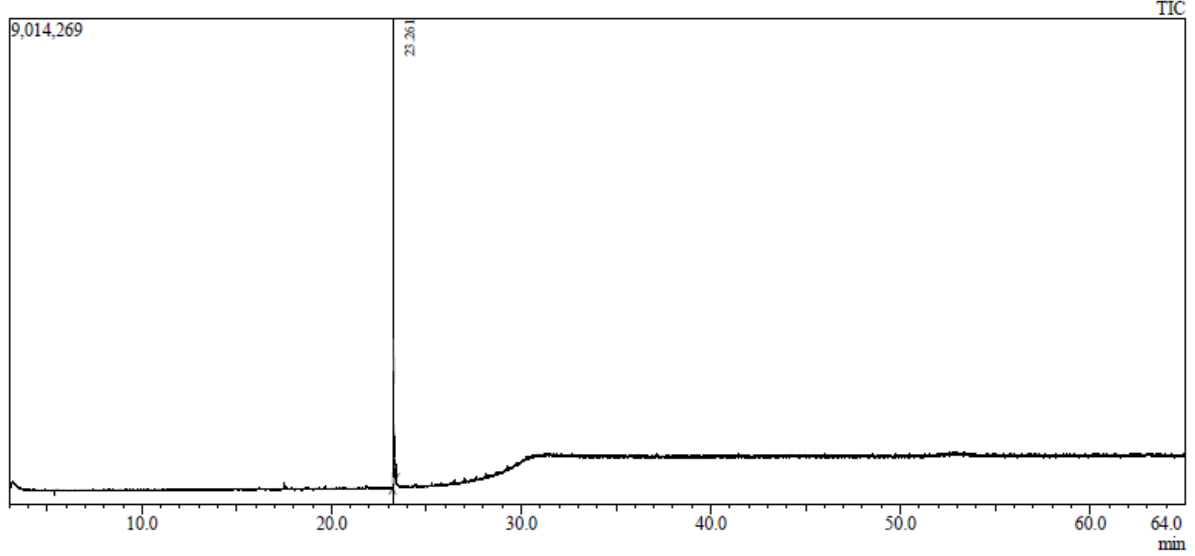

| Peak Report TIC |        |        |        |          |        |         |         |      |      |      |
|-----------------|--------|--------|--------|----------|--------|---------|---------|------|------|------|
| Peak#           | R.Time | I.Time | F.Time | Area     | Area%  | Height  | Height% | A/H  | Mark | Name |
| 1               | 23.261 | 23.220 | 23.390 | 16471004 | 100.00 | 8685542 | 100.00  | 1.90 |      |      |
|                 |        |        |        | 16471004 | 100.00 | 8685542 | 100.00  |      |      |      |

Spectrum

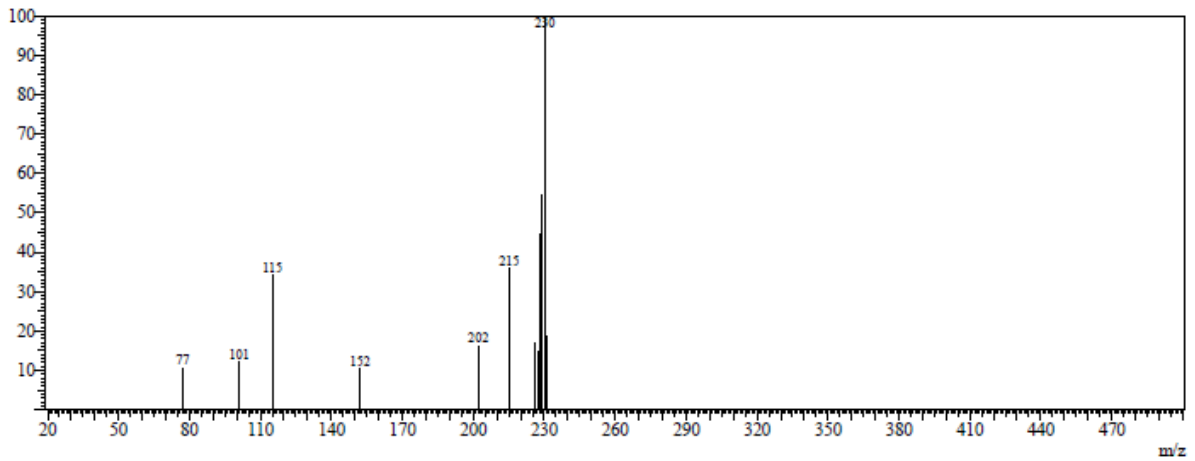

Mass Table

| #  | m/z    | Abs. Int. | Rel. Int. |
|----|--------|-----------|-----------|
| 1  | 77.10  | 154992    | 10.59     |
| 2  | 101.10 | 175586    | 12.00     |
| 3  | 115.10 | 500335    | 34.20     |
| 4  | 152.15 | 152138    | 10.40     |
| 5  | 202.10 | 235766    | 16.11     |
| 6  | 215.15 | 522003    | 35.68     |
| 7  | 226.15 | 245221    | 16.76     |
| 8  | 227.15 | 215436    | 14.72     |
| 9  | 228.15 | 650778    | 44.48     |
| 10 | 229.15 | 796592    | 54.45     |
| 11 | 230.15 | 1463100   | 100.00    |
| 12 | 231.15 | 271316    | 18.54     |

Sample Information

Analyzed by : Admin  
 Analyzed : 24-3-2016 18:42:05  
 Sample Type : Unknown  
 Sample Name : EXP-CCA-41  
 \$IS(Tray!=)Tray : Tray1  
 Sample Amount : 1  
 Dilution Factor : 1  
 Injection Volume : 1.00  
 Modified by : Admin  
 Modified : 24-3-2016 19:17:06

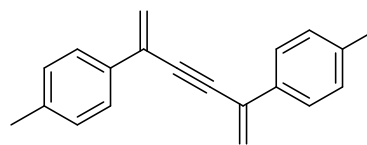

Chromatogram EXP-CCA-41 D:\Data 2016\group Minnaard\Chris\GCMS-07-Exp-CCA-41.qgd

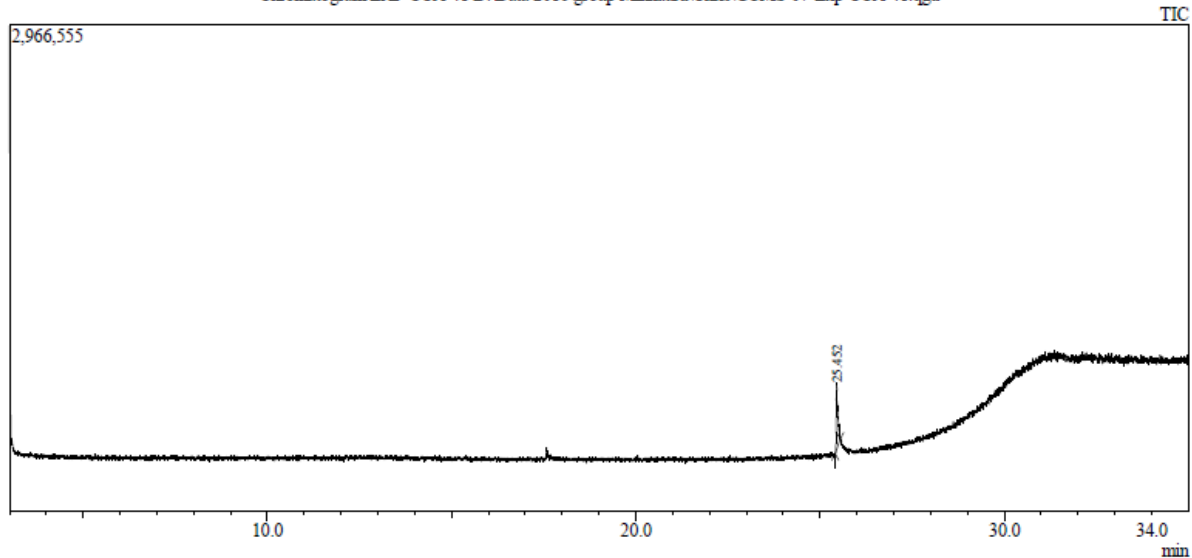

| Peak# | R.Time | I.Time | F.Time | Area    | Area%  | Height | Height% | A/H  | Mark | Name |
|-------|--------|--------|--------|---------|--------|--------|---------|------|------|------|
| 1     | 25.452 | 25.415 | 25.545 | 1292453 | 100.00 | 407181 | 100.00  | 3.17 |      |      |
|       |        |        |        | 1292453 | 100.00 | 407181 | 100.00  |      |      |      |

Spectrum

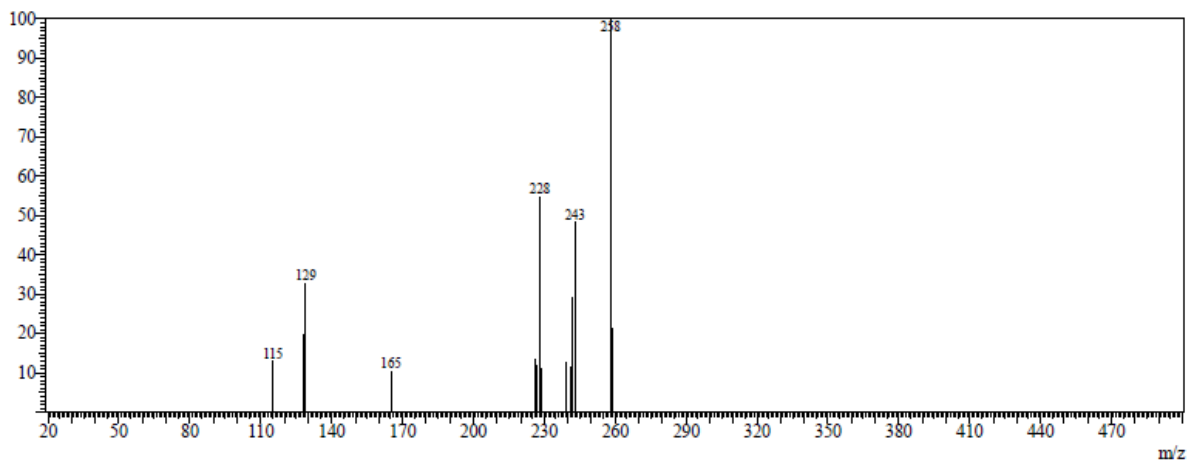

Mass Table

| #  | m/z    | Abs. Int. | Rel. Int. |
|----|--------|-----------|-----------|
| 1  | 115.10 | 7883      | 12.90     |
| 2  | 128.05 | 11971     | 19.59     |
| 3  | 129.05 | 19985     | 32.71     |
| 4  | 165.05 | 6284      | 10.29     |
| 5  | 226.10 | 8191      | 13.41     |
| 6  | 226.95 | 7255      | 11.87     |
| 7  | 228.05 | 33419     | 54.70     |
| 8  | 228.95 | 6889      | 11.28     |
| 9  | 239.00 | 7673      | 12.56     |
| 10 | 241.00 | 6981      | 11.43     |
| 11 | 242.05 | 17756     | 29.06     |
| 12 | 243.05 | 29466     | 48.23     |
| 13 | 258.05 | 61095     | 100.00    |
| 14 | 259.10 | 13015     | 21.30     |

Sample Information

Analyzed by : Admin  
 Analyzed : 24-3-2016 15:56:30  
 Sample Type : Unknown  
 Sample Name : GBW-190-3  
 SIFS(Tray)=Tray : Tray1  
 Sample Amount : 1  
 Dilution Factor : 1  
 Injection Volume : 1.00  
 Modified by : Admin  
 Modified : 24-3-2016 16:31:30

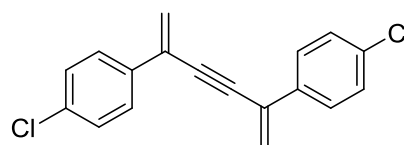

Chromatogram GBW-190-3 D:\Data 2016\group Minnaard\Gongbao\GBW190-3.qgd

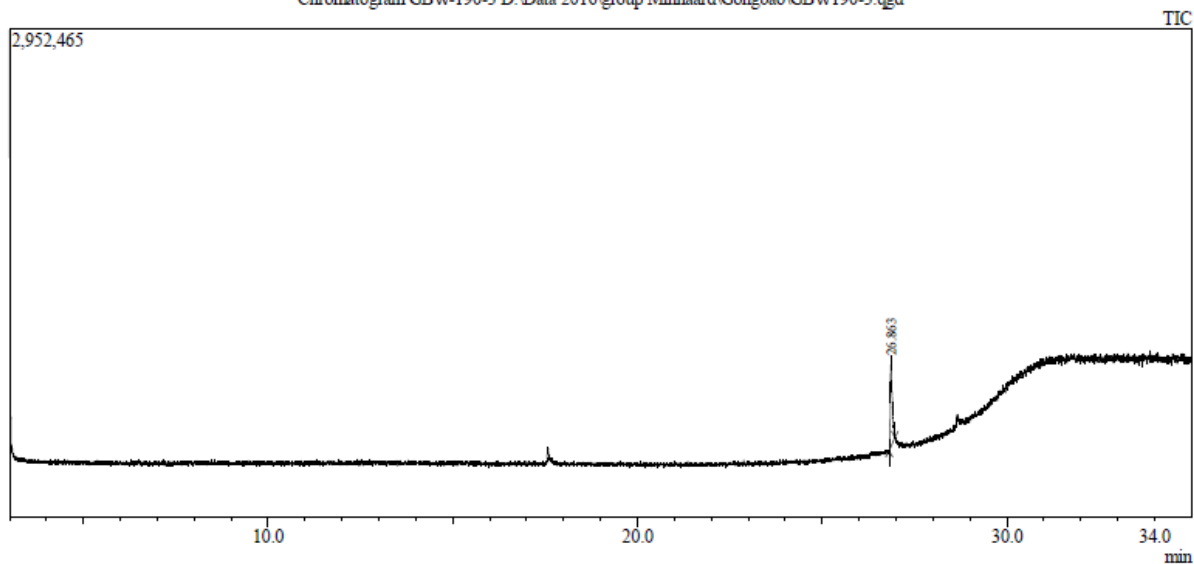

| Peak# | R.Time | I.Time | F.Time | Area    | Area%  | Height | Height% | A/H  | Mark | Name |
|-------|--------|--------|--------|---------|--------|--------|---------|------|------|------|
| 1     | 26.863 | 26.815 | 26.970 | 1854555 | 100.00 | 552407 | 100.00  | 3.36 |      |      |
|       |        |        |        | 1854555 | 100.00 | 552407 | 100.00  |      |      |      |

Spectrum

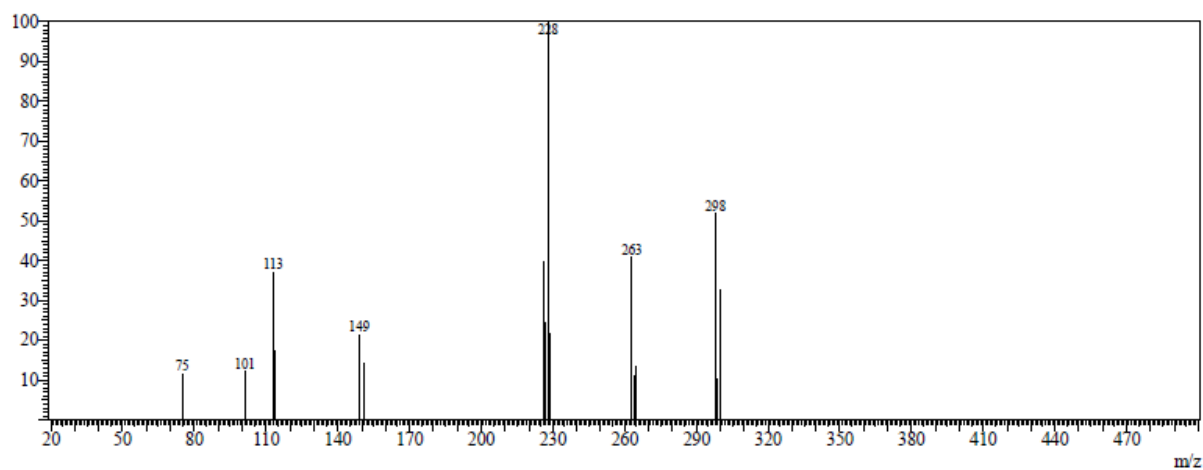

Mass Table

| #  | m/z    | Abs. Int. | Rel. Int. |
|----|--------|-----------|-----------|
| 1  | 74.95  | 8926      | 11.60     |
| 2  | 101.10 | 9404      | 12.23     |
| 3  | 113.00 | 28569     | 37.14     |
| 4  | 113.95 | 13391     | 17.41     |
| 5  | 149.05 | 16484     | 21.43     |
| 6  | 151.00 | 10874     | 14.14     |
| 7  | 226.00 | 30662     | 39.86     |
| 8  | 227.00 | 18655     | 24.25     |
| 9  | 228.00 | 76923     | 100.00    |
| 10 | 229.00 | 16657     | 21.65     |
| 11 | 263.00 | 31424     | 40.85     |
| 12 | 264.05 | 8464      | 11.00     |
| 13 | 265.00 | 10340     | 13.44     |
| 14 | 297.95 | 39862     | 51.82     |
| 15 | 298.95 | 7926      | 10.30     |

Sample Information

Analyzed by : Admin  
 Analyzed : 30-3-2016 18:51:25  
 Sample Type : Unknown  
 Sample Name : gbw-194  
 SIFS (Tray!=)Tray : Tray1  
 Sample Amount : 1  
 Dilution Factor : 1  
 Injection Volume : 2.00  
 Modified by : Admin  
 Modified : 30-3-2016 19:26:25

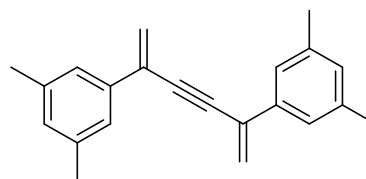

Chromatogram gbw-194 D:\Data 2016\group Minnaard\Gongbao\GBW194.qgd

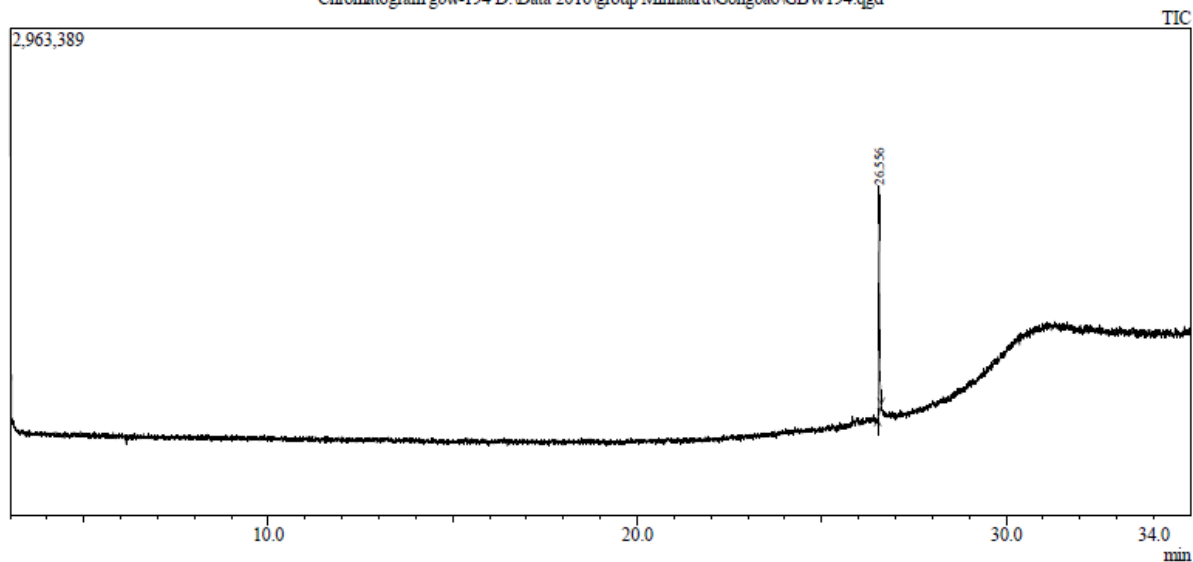

| Peak# | R.Time | I.Time | F.Time | Area    | Area%  | Height  | Height% | A/H  | Mark | Name |
|-------|--------|--------|--------|---------|--------|---------|---------|------|------|------|
| 1     | 26.556 | 26.515 | 26.615 | 2571569 | 100.00 | 1389439 | 100.00  | 1.85 |      |      |
|       |        |        |        | 2571569 | 100.00 | 1389439 | 100.00  |      |      |      |

Spectrum

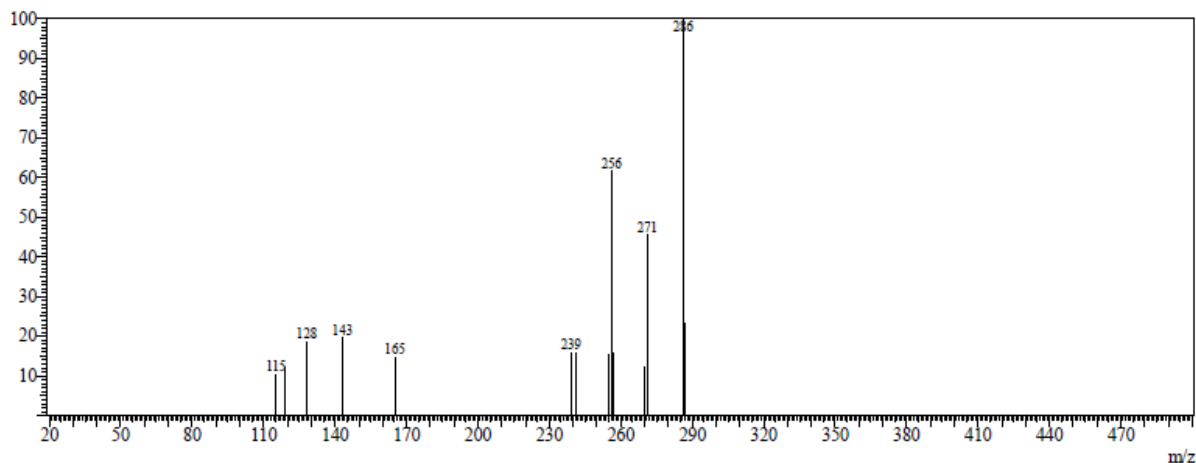

Mass Table

| #  | m/z    | Abs. Int. | Rel. Int. |
|----|--------|-----------|-----------|
| 1  | 115.10 | 19791     | 10.44     |
| 2  | 119.20 | 23288     | 12.29     |
| 3  | 128.05 | 35411     | 18.68     |
| 4  | 143.10 | 37179     | 19.61     |
| 5  | 165.05 | 27964     | 14.75     |
| 6  | 239.05 | 30158     | 15.91     |
| 7  | 241.05 | 30129     | 15.89     |
| 8  | 255.10 | 28846     | 15.22     |
| 9  | 256.10 | 116723    | 61.58     |
| 10 | 257.10 | 29807     | 15.72     |
| 11 | 270.10 | 23430     | 12.36     |
| 12 | 271.10 | 86218     | 45.48     |
| 13 | 286.15 | 189558    | 100.00    |
| 14 | 287.15 | 43945     | 23.18     |

Sample Information

Analyzed by : Admin  
 Analyzed : 5-4-2016 11:16:30  
 Sample Type : Unknown  
 Sample Name : gbw199-1  
 \$IFS(Tray!=)Tray : Tray1  
 Sample Amount : 1  
 Dilution Factor : 1  
 Injection Volume : 1.00  
 Modified by : Admin  
 Modified : 5-4-2016 11:51:30

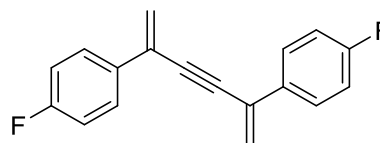

Chromatogram gbw199-1.D\Data 2016\group Minnaard\Gongbao\GBW199-1.qgd

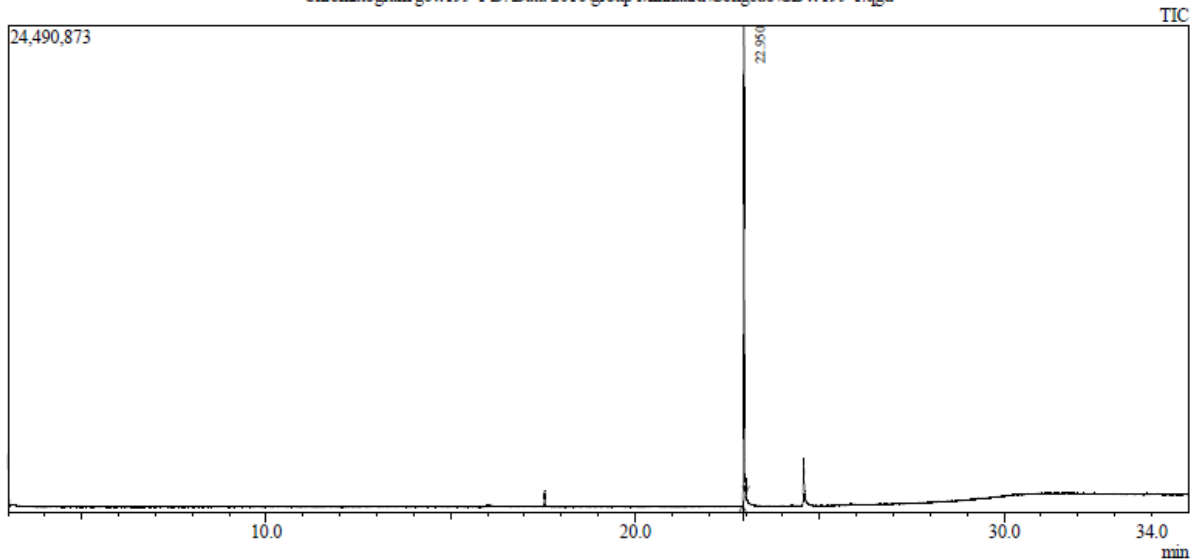

| Peak# | R.Time | I.Time | F.Time | Area     | Area%  | Height   | Height% | A/H  | Mark | Name |
|-------|--------|--------|--------|----------|--------|----------|---------|------|------|------|
| 1     | 22.950 | 22.915 | 23.000 | 36844705 | 100.00 | 23897739 | 100.00  | 1.54 |      |      |
|       |        |        |        | 36844705 | 100.00 | 23897739 | 100.00  |      |      |      |

Spectrum

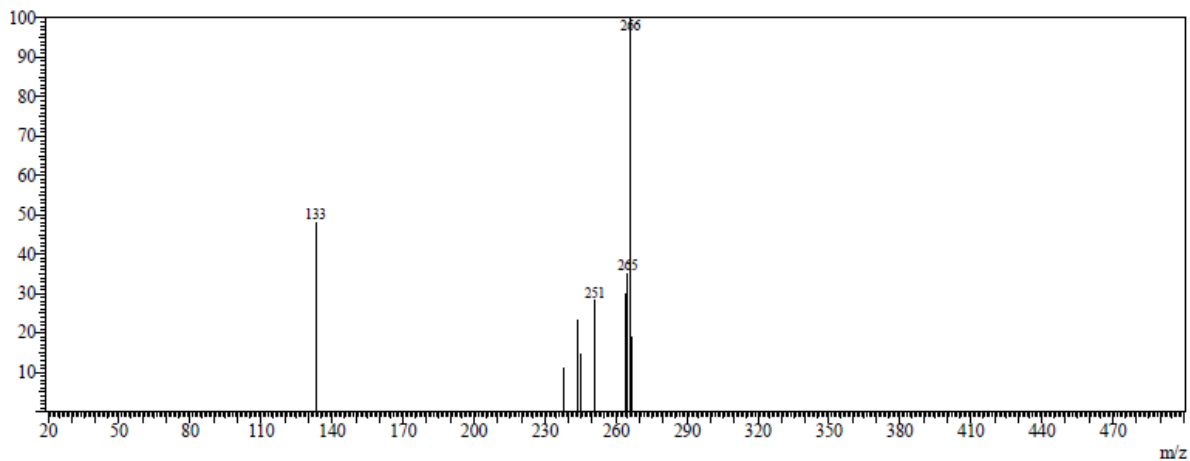

Mass Table

| # | m/z    | Abs. Int. | Rel. Int. |
|---|--------|-----------|-----------|
| 1 | 133.05 | 1886962   | 48.10     |
| 2 | 238.00 | 440610    | 11.23     |
| 3 | 244.05 | 910797    | 23.22     |
| 4 | 245.00 | 566402    | 14.44     |
| 5 | 251.05 | 1106053   | 28.20     |
| 6 | 264.00 | 1170347   | 29.84     |
| 7 | 265.00 | 1376402   | 35.09     |
| 8 | 266.05 | 3922608   | 100.00    |
| 9 | 267.05 | 738660    | 18.83     |

Sample Information

Analyzed by : Admin  
 Analyzed : 13-4-2016 20:23:51  
 Sample Type : Unknown  
 Sample Name : gbw-203-fraction1  
 \$f\$ (Tray) => Tray : Tray1  
 Sample Amount : 1  
 Dilution Factor : 1  
 Injection Volume : 1.00  
 Modified by : Admin  
 Modified : 13-4-2016 20:58:52

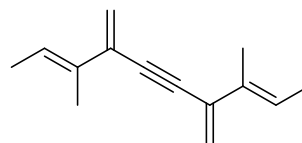

Chromatogram gbw-203-fraction1 D:\Data 2016\group Mimnaard\Gongbao\GBW-203-fraction1.qgd

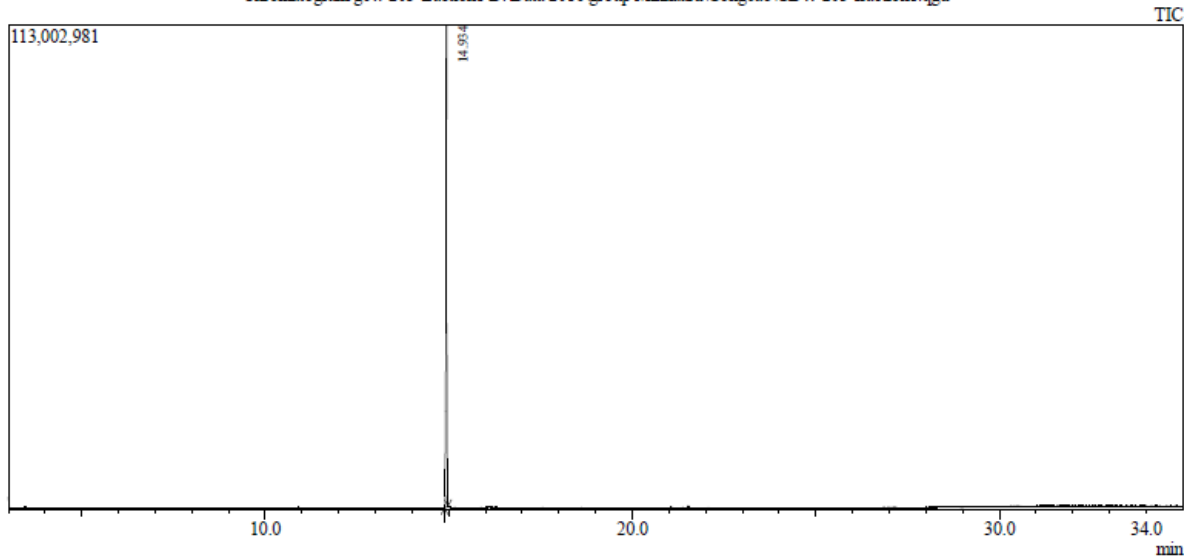

| Peak# | R. Time | I. Time | F. Time | Area      | Area%  | Height    | Height% | A/H  | Mark | Name |
|-------|---------|---------|---------|-----------|--------|-----------|---------|------|------|------|
| 1     | 14.934  | 14.885  | 14.980  | 176493392 | 100.00 | 112478961 | 100.00  | 1.57 |      |      |
|       |         |         |         | 176493392 | 100.00 | 112478961 | 100.00  |      |      |      |

Spectrum

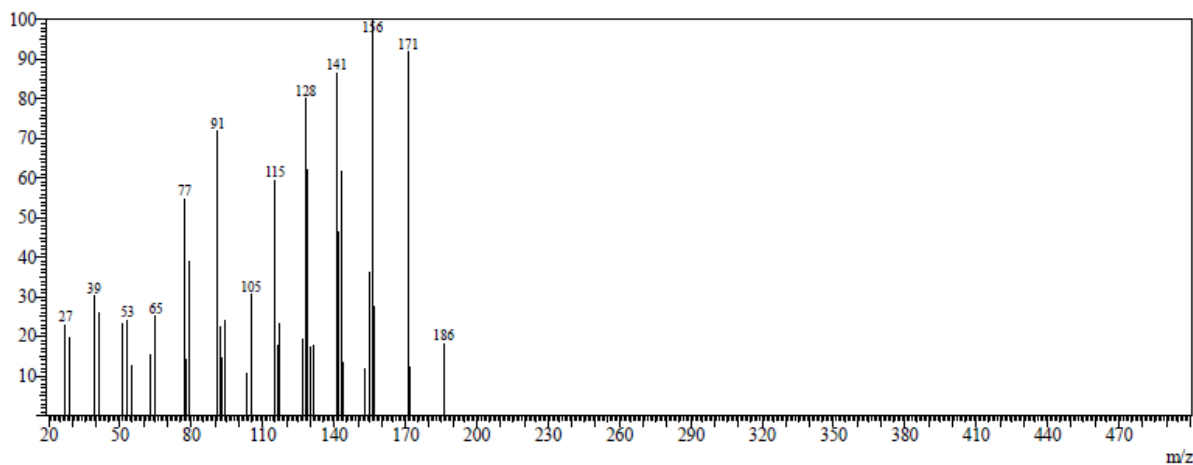

Mass Table

| #  | m/z   | Abs. Int. | Rel. Int. |
|----|-------|-----------|-----------|
| 1  | 27.05 | 1582277   | 22.92     |
| 2  | 29.05 | 1372585   | 19.88     |
| 3  | 39.05 | 2090067   | 30.28     |
| 4  | 41.05 | 1798370   | 26.05     |
| 5  | 51.00 | 1603031   | 23.22     |
| 6  | 53.05 | 1665569   | 24.13     |
| 7  | 55.05 | 866829    | 12.56     |
| 8  | 63.00 | 1049601   | 15.21     |
| 9  | 65.00 | 1736010   | 25.15     |
| 10 | 77.00 | 3775611   | 54.70     |
| 11 | 78.00 | 984827    | 14.27     |
| 12 | 79.05 | 2690214   | 38.97     |
| 13 | 91.05 | 4959802   | 71.85     |
| 14 | 92.05 | 1558959   | 22.58     |
| 15 | 93.05 | 994625    | 14.41     |



| #  | m/z    | Abs. Int. | Rel. Int. |
|----|--------|-----------|-----------|
| 16 | 94.05  | 1644054   | 23.82     |
| 17 | 103.05 | 743433    | 10.77     |
| 18 | 105.05 | 2115388   | 30.65     |
| 19 | 115.05 | 4101506   | 59.42     |
| 20 | 116.05 | 1229172   | 17.81     |
| 21 | 117.05 | 1602804   | 23.22     |
| 22 | 127.00 | 1346991   | 19.51     |
| 23 | 128.05 | 5522082   | 80.00     |
| 24 | 129.05 | 4286348   | 62.10     |
| 25 | 130.05 | 1189401   | 17.23     |
| 26 | 131.10 | 1212085   | 17.56     |
| 27 | 141.05 | 5968519   | 86.46     |
| 28 | 142.05 | 3192094   | 46.24     |
| 29 | 143.10 | 4244026   | 61.48     |
| 30 | 144.10 | 917719    | 13.29     |
| 31 | 153.05 | 828054    | 12.00     |
| 32 | 155.10 | 2486721   | 36.02     |
| 33 | 156.10 | 6902826   | 100.00    |
| 34 | 157.10 | 1904816   | 27.59     |
| 35 | 171.10 | 6333245   | 91.75     |
| 36 | 172.10 | 856629    | 12.41     |
| 37 | 186.05 | 1252671   | 18.15     |

Sample Information

Analyzed by : Admin  
 Analyzed : 18-4-2016 19:30:41  
 Sample Type : Unknown  
 Sample Name : gbw-208  
 \$IFS(Tray!=)Tray : Tray1  
 Sample Amount : 1  
 Dilution Factor : 1  
 Injection Volume : 1.00  
 Modified by : Admin  
 Modified : 18-4-2016 20:05:42

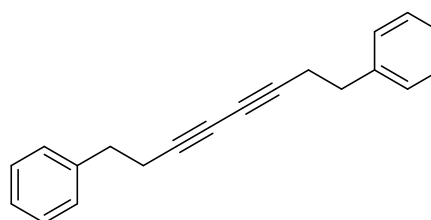

Chromatogram gbw-208.D:\Data 2016\group Minnaard\Gongbao\GBW-208.qgd

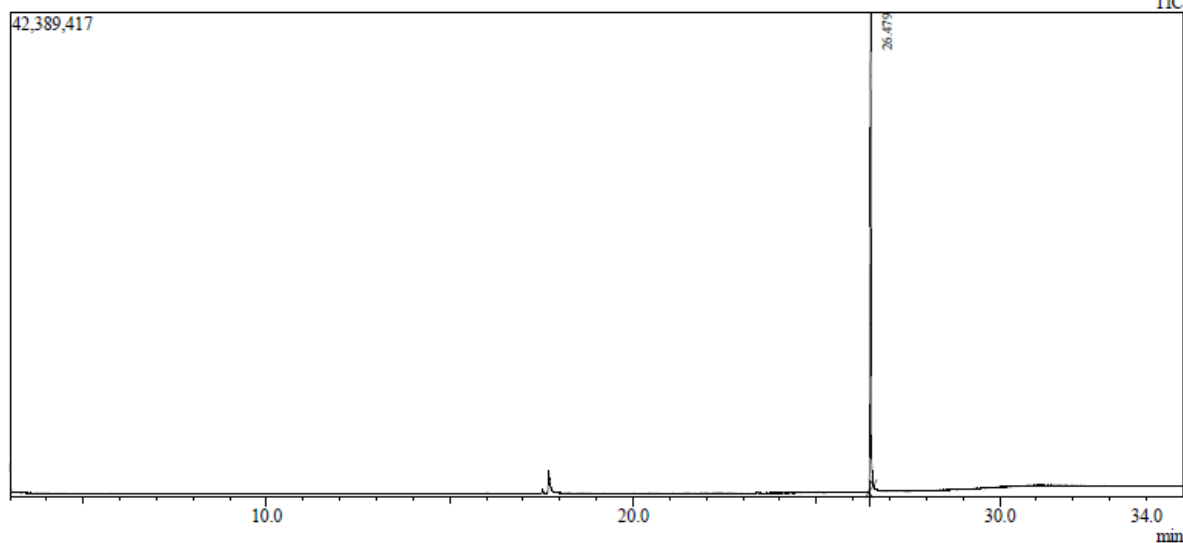

| Peak# | R.Time | I.Time | F.Time | Area     | Area%  | Height   | Height% | A/H  | Mark | Name |
|-------|--------|--------|--------|----------|--------|----------|---------|------|------|------|
| 1     | 26.475 | 26.430 | 26.555 | 73296796 | 100.00 | 41780630 | 100.00  | 1.75 |      |      |
|       |        |        |        | 73296796 | 100.00 | 41780630 | 100.00  |      |      |      |

Spectrum

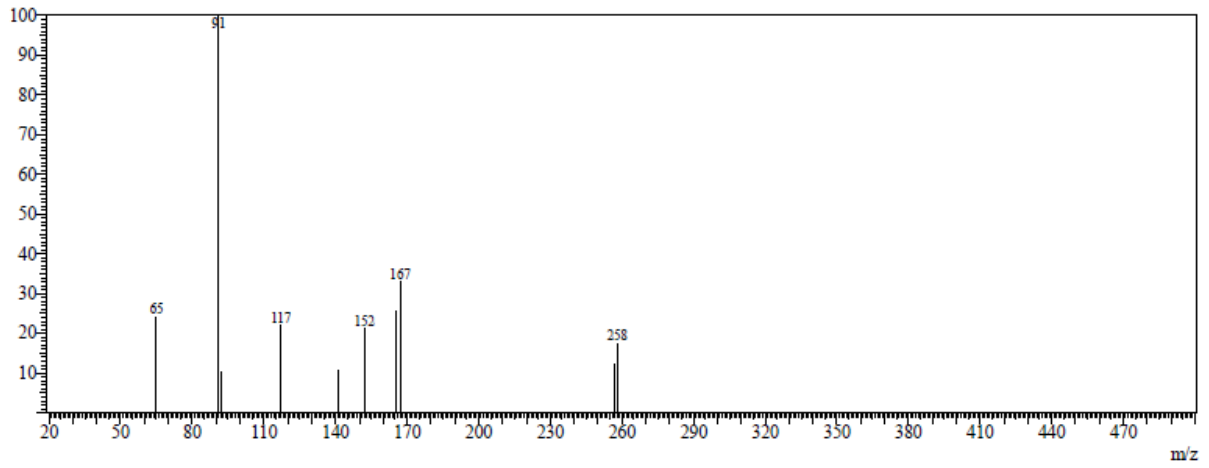

Mass Table

| #  | m/z    | Abs. Int. | Rel. Int. |
|----|--------|-----------|-----------|
| 1  | 65.00  | 2000136   | 24.12     |
| 2  | 91.05  | 8293172   | 100.00    |
| 3  | 92.05  | 850494    | 10.26     |
| 4  | 117.10 | 1826280   | 22.02     |
| 5  | 141.05 | 891506    | 10.75     |
| 6  | 152.10 | 1757378   | 21.19     |
| 7  | 165.05 | 2128326   | 25.66     |
| 8  | 167.05 | 2731657   | 32.94     |
| 9  | 257.05 | 1024656   | 12.36     |
| 10 | 258.05 | 1436980   | 17.33     |
